# Supplementary material for: Imprints and DPPA3 are bypassed during pluripotency- and differentiation-coupled methylation reprogramming in testicular germ cell tumors
Source: PubMed Central journal article supplement — Genome Res. 2016 Nov;26(11):1490–504. doi: 10.1101/gr.201293.115 (PMC5088592; doi:10.1101/gr.201293.115), 2016-11
Supplement: supp_gr.201293.115_Supplemental_FigS3.pdf [file supp_gr.201293.115_Supplemental_FigS3.pdf]

**A**

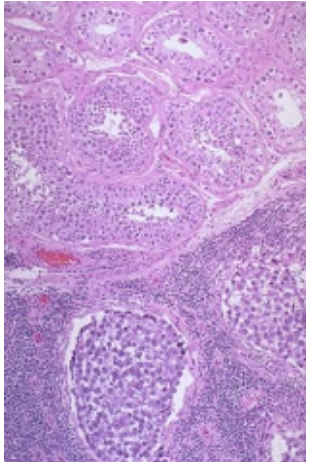

**B**

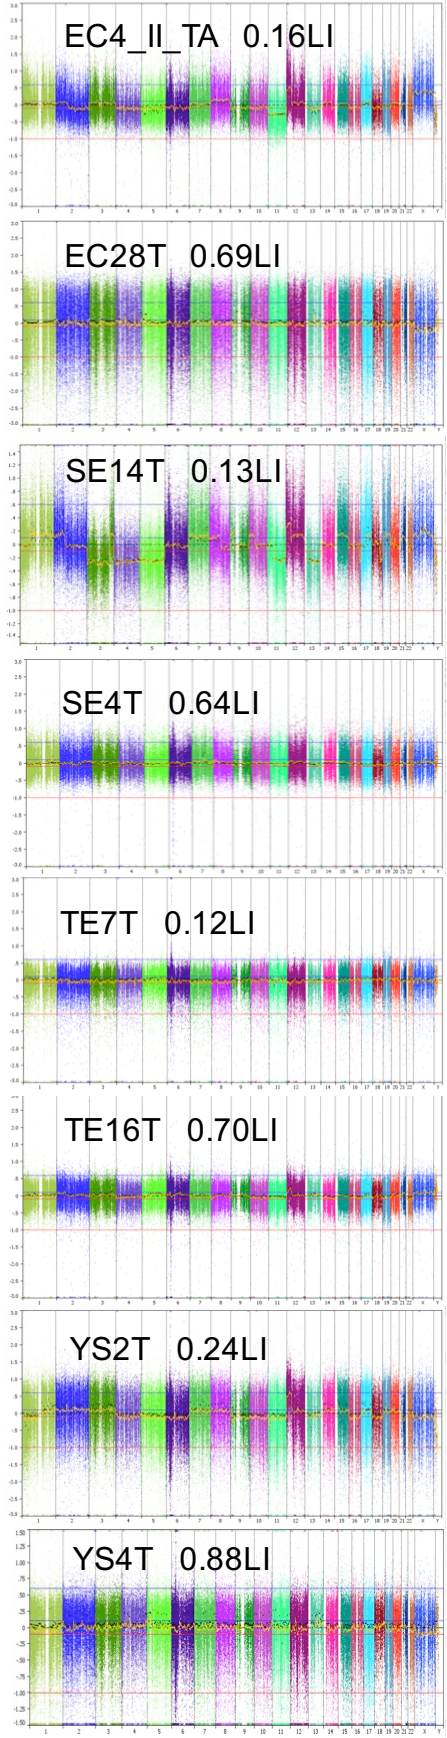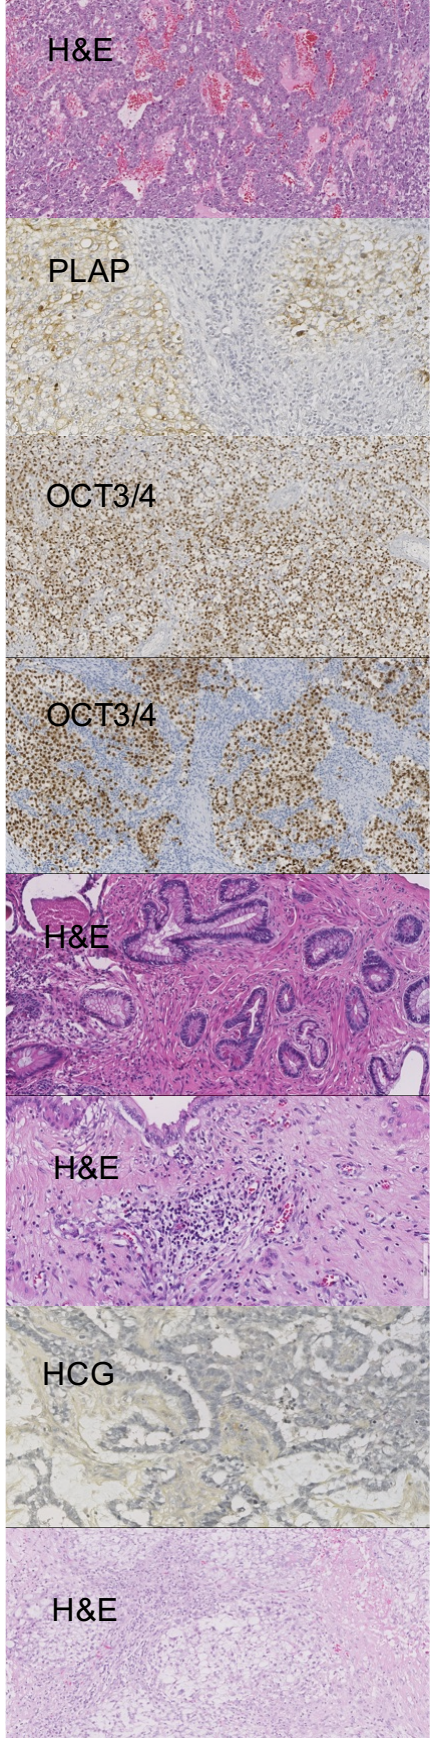

**C** Somatic primary cell lines

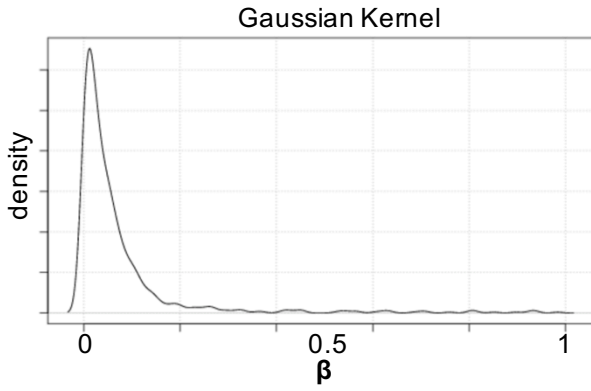

**D** TGCT cell lines

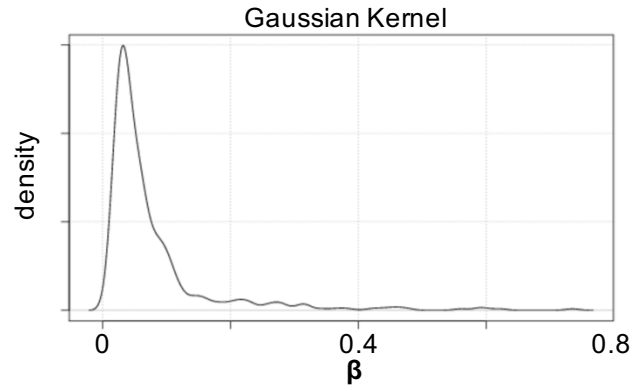

**E** Leukocytes

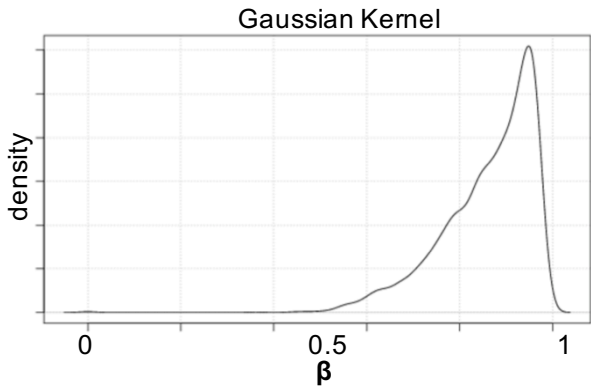

**F**

**DAVID Bioinformatics Resources 6.7**  
National Institute of Allergy and Infectious Diseases (NIAID), NIH

**Functional Annotation Chart** [Help and Manual](#)

Current Gene List: List\_1  
Current Background: Homo sapiens  
25 DAVID IDs

Options

10 chart records [Download File](#)

| Sublist                  | Category             | Term                                      | RT | Genes | Count | %    | P-Value | Benjamini |
|--------------------------|----------------------|-------------------------------------------|----|-------|-------|------|---------|-----------|
| <input type="checkbox"/> | UNIGENE_EST_QUARTILE | blood_normal_3rd                          | RT |       | 14    | 56.0 | 3.5E-6  | 2.6E-4    |
| <input type="checkbox"/> | UNIGENE_EST_QUARTILE | leukemia_disease_3rd                      | RT |       | 14    | 56.0 | 4.2E-5  | 1.6E-3    |
| <input type="checkbox"/> | UNIGENE_EST_QUARTILE | thymus_normal_3rd                         | RT |       | 12    | 48.0 | 2.5E-4  | 6.2E-3    |
| <input type="checkbox"/> | UNIGENE_EST_QUARTILE | spleen_normal_3rd                         | RT |       | 11    | 44.0 | 4.9E-4  | 9.2E-3    |
| <input type="checkbox"/> | UNIGENE_EST_QUARTILE | tonsil_normal_3rd                         | RT |       | 7     | 28.0 | 5.6E-3  | 8.1E-2    |
| <input type="checkbox"/> | UNIGENE_EST_QUARTILE | lymph node_normal_3rd                     | RT |       | 11    | 44.0 | 8.0E-3  | 9.6E-2    |
| <input type="checkbox"/> | UNIGENE_EST_QUARTILE | juvenile (< 17 years old)_development_3rd | RT |       | 8     | 32.0 | 4.4E-2  | 3.8E-1    |
| <input type="checkbox"/> | UNIGENE_EST_QUARTILE | germ cell tumor_disease_3rd               | RT |       | 10    | 40.0 | 7.2E-2  | 5.0E-1    |
| <input type="checkbox"/> | UNIGENE_EST_QUARTILE | thyroid tumor_disease_3rd                 | RT |       | 8     | 32.0 | 7.7E-2  | 4.9E-1    |
| <input type="checkbox"/> | UNIGENE_EST_QUARTILE | heart_normal_3rd                          | RT |       | 8     | 32.0 | 1.0E-1  | 5.4E-1    |

Supplemental Fig. S3. Lymphoid infiltration index (LI) corresponds with histological lymphoid infiltrate and SCNA suppression in array profiles. **A.** SE engulfed in lymphocytes. **B.** SCNA profile and histology are shown for representative low-and high-LI cases. Tumor histology and SCNA plots were inspected for correspondence with LI, which confirmed the expected elevated lymphoid frequency and impaired detection of SCNA in these specimens, further validating exclusion of 12p-neutral TGCT (n=22). Overall, tumor tissue methylation data were found to be amenable to correction for lymphoid cell frequency, more accurately reflecting intrinsic tumor-cell target methylation. **C-E.** Further validations of leukocyte-specificity of LS36 allelic methylation targets used to measure TGCT tissue infiltrates. **C.** Near absent allelic methylation (Kernel density estimation (KDE)) of LS36 in somatic primary specimens (n=22, GSE30654). **D.** Near absent allelic methylation (KDE) of LS36 in TGCT cell lines (n=12, GSE60787). **E.** Biallelic methylation of LS36 (KDE) in leukocyte reference panel (n=117, GSE67393). **F.** Gene functional annotation analysis on the LS36 showed significant enrichment for leukocyte related annotations.
