# Supplementary material for: Imprints and DPPA3 are bypassed during pluripotency- and differentiation-coupled methylation reprogramming in testicular germ cell tumors
Source: PubMed Central journal article supplement — Genome Res. 2016 Nov;26(11):1490–504. doi: 10.1101/gr.201293.115 (PMC5088592; doi:10.1101/gr.201293.115), 2016-11
Supplement: supp_gr.201293.115_Supplemental_FigS6.pdf [file supp_gr.201293.115_Supplemental_FigS6.pdf]

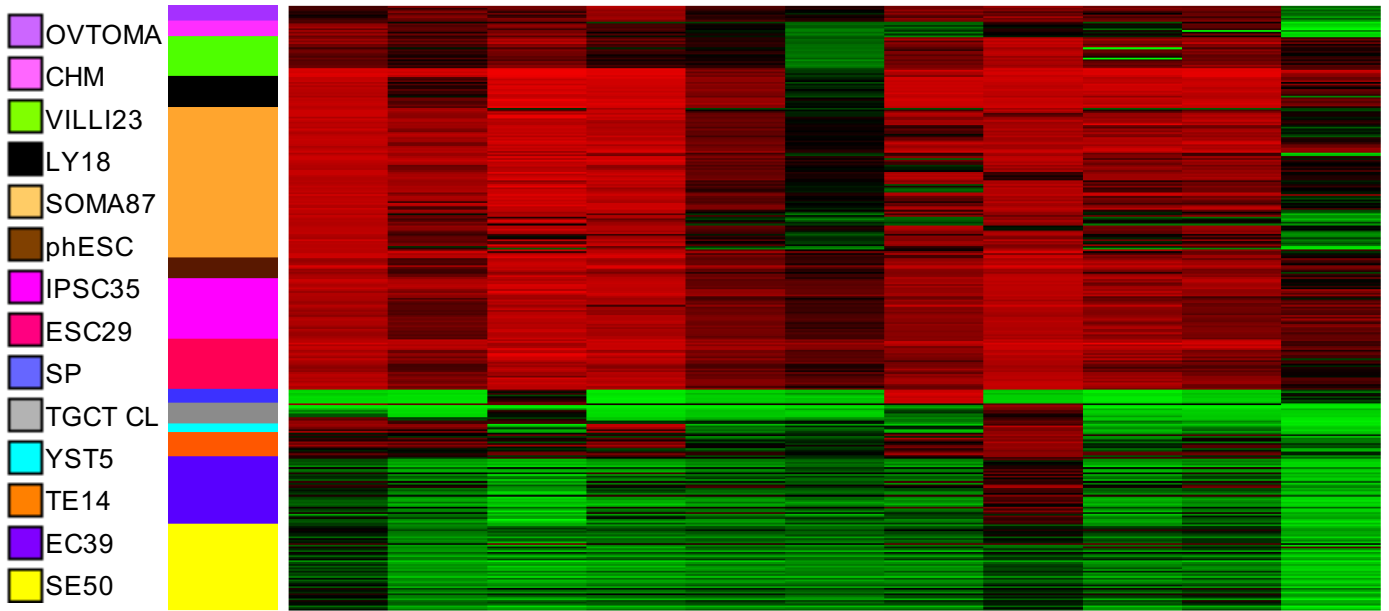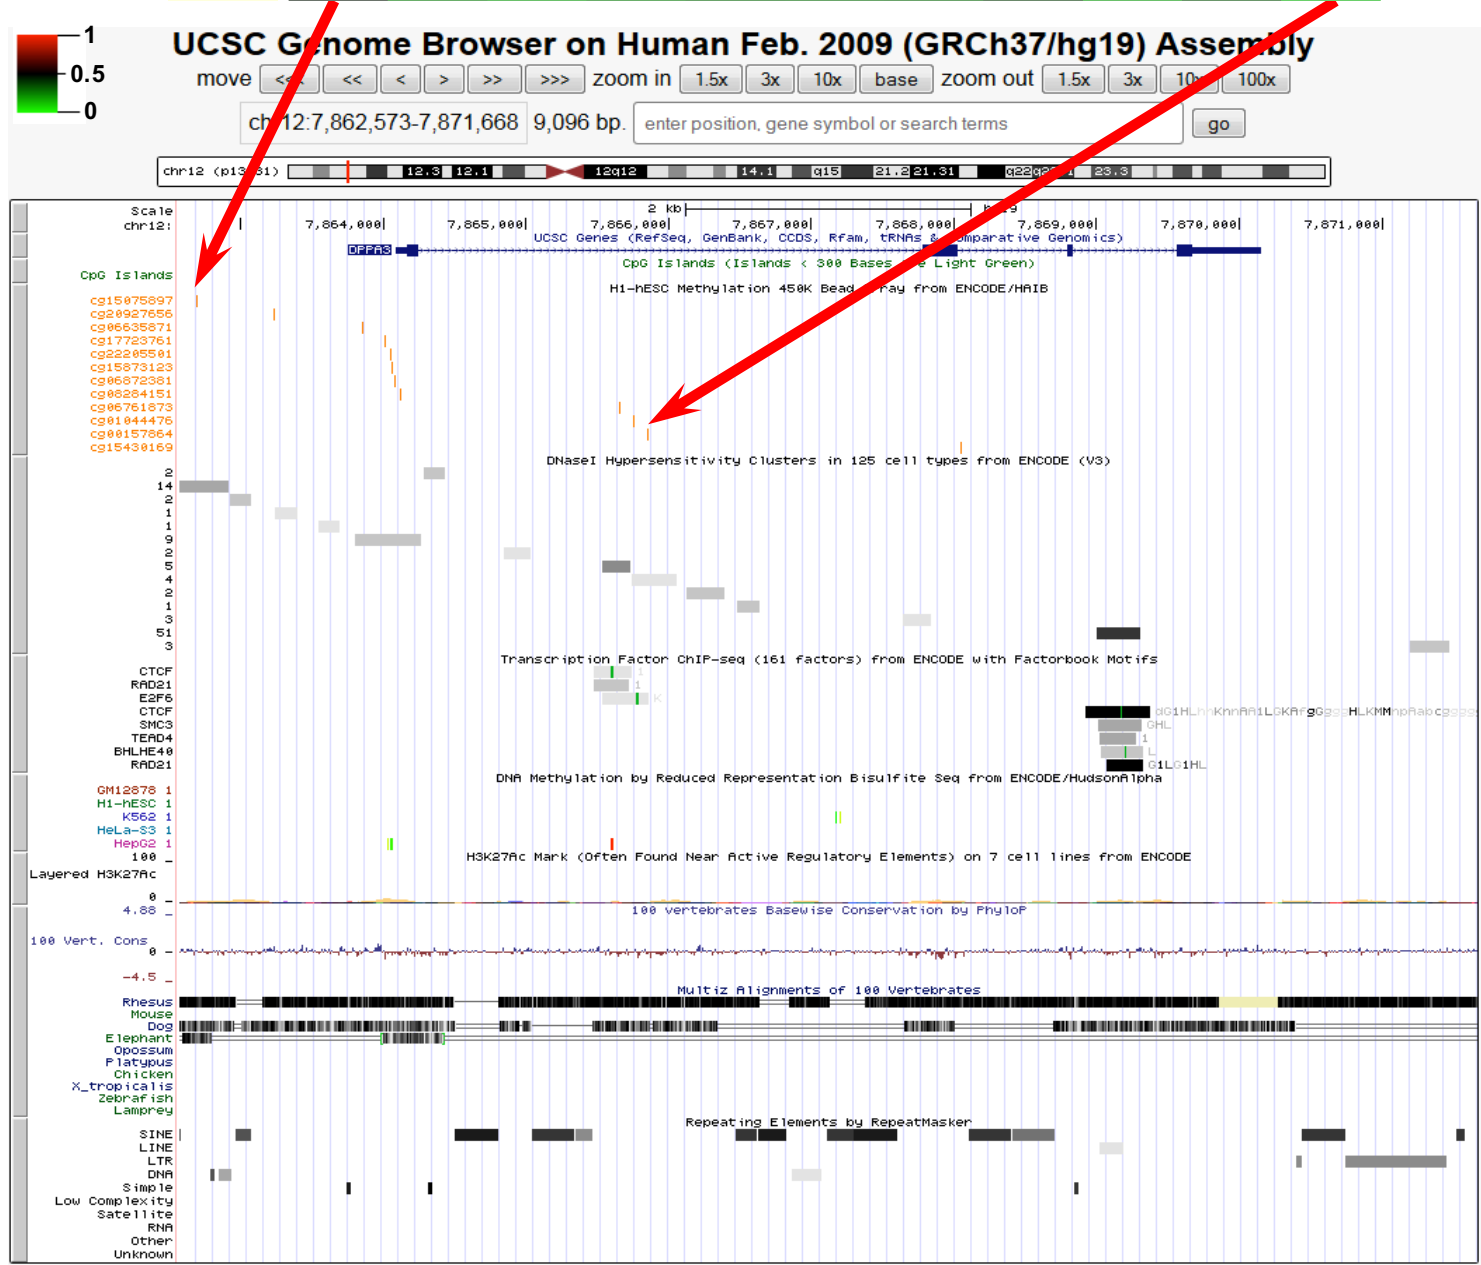

Supplemental Fig. S6. Analysis of *DPPA3* methylation state in TGCT and references. Methylation erasure of *DPPA3* spans the non-CpG-island promoter-proximal 11 CpG array targets and is unique to TGCT and male germline among tested references, and correlates with elevated gene expression in TGCT (Saitou et al. 2003), properties likely descended from PGC ancestry (erasure of *DPPA3* in PGC shown in Fig. 3). Chromosome positions shown in UCSC Genome Browser screenshot, along with genomic functional annotations described in the text.
