# Supplementary material for: Imprints and DPPA3 are bypassed during pluripotency- and differentiation-coupled methylation reprogramming in testicular germ cell tumors
Source: PubMed Central journal article supplement — Genome Res. 2016 Nov;26(11):1490–504. doi: 10.1101/gr.201293.115 (PMC5088592; doi:10.1101/gr.201293.115), 2016-11
Supplement: supp_gr.201293.115_Supplemental_FigS7.pdf [file supp_gr.201293.115_Supplemental_FigS7.pdf]

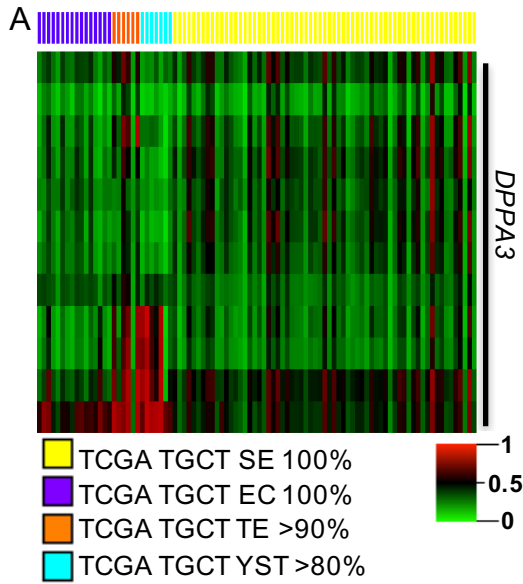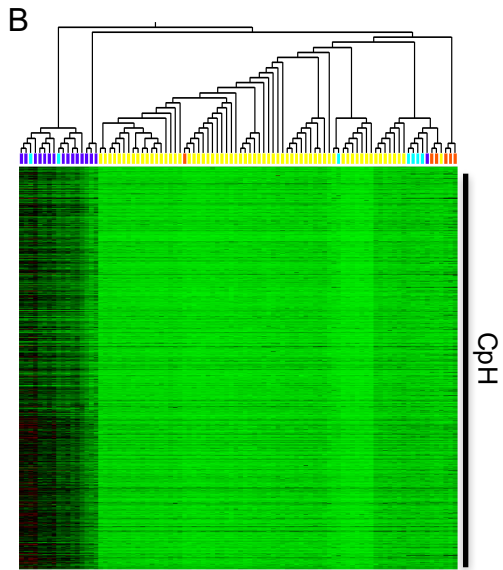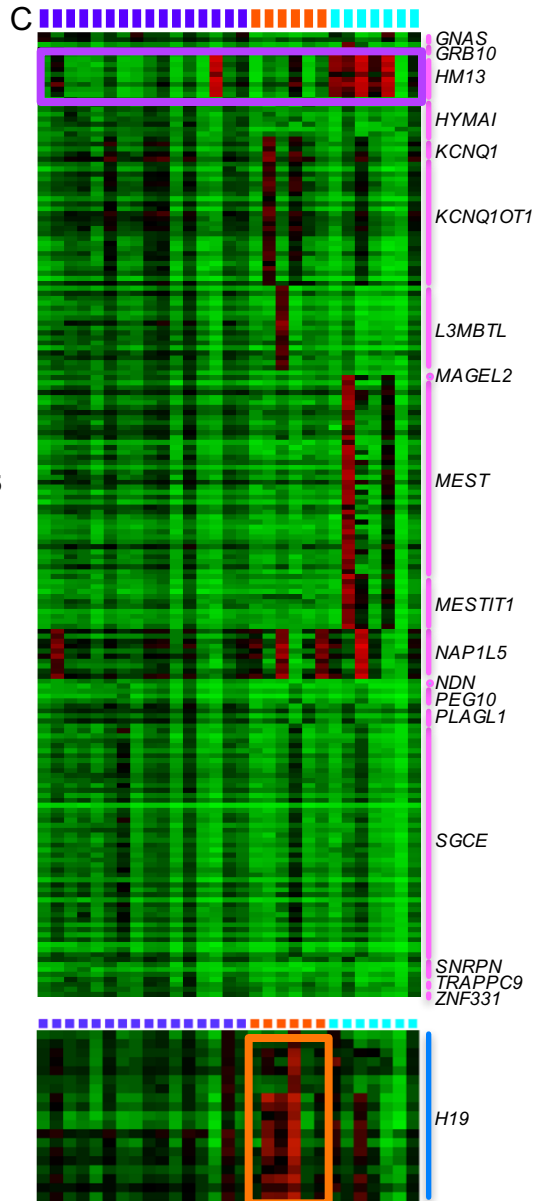

Supplemental Fig. S7. Validation of key methylation findings in independent TGCT dataset from TCGA. Public level 1 Illumina 450K methylation data were downloaded, and samples were selected for analysis based on annotated purity for histologic subtypes as indicated in samples color legend. **A.** *DPPA3* methylation is erased. **B.** mCH targets are specifically methylated in EC. **C.** Globally imprints are erased, with focal, recurrent imprinted gene hypermethylation, notably *HM13* in NS (purple rectangle), and *H19* in TE (orange rectangle).
