# Supplementary material for: Imprints and DPPA3 are bypassed during pluripotency- and differentiation-coupled methylation reprogramming in testicular germ cell tumors
Source: PubMed Central journal article supplement — Genome Res. 2016 Nov;26(11):1490–504. doi: 10.1101/gr.201293.115 (PMC5088592; doi:10.1101/gr.201293.115), 2016-11
Supplement: supp_gr.201293.115_Supplemental_FigS8.pdf [file supp_gr.201293.115_Supplemental_FigS8.pdf]

**A**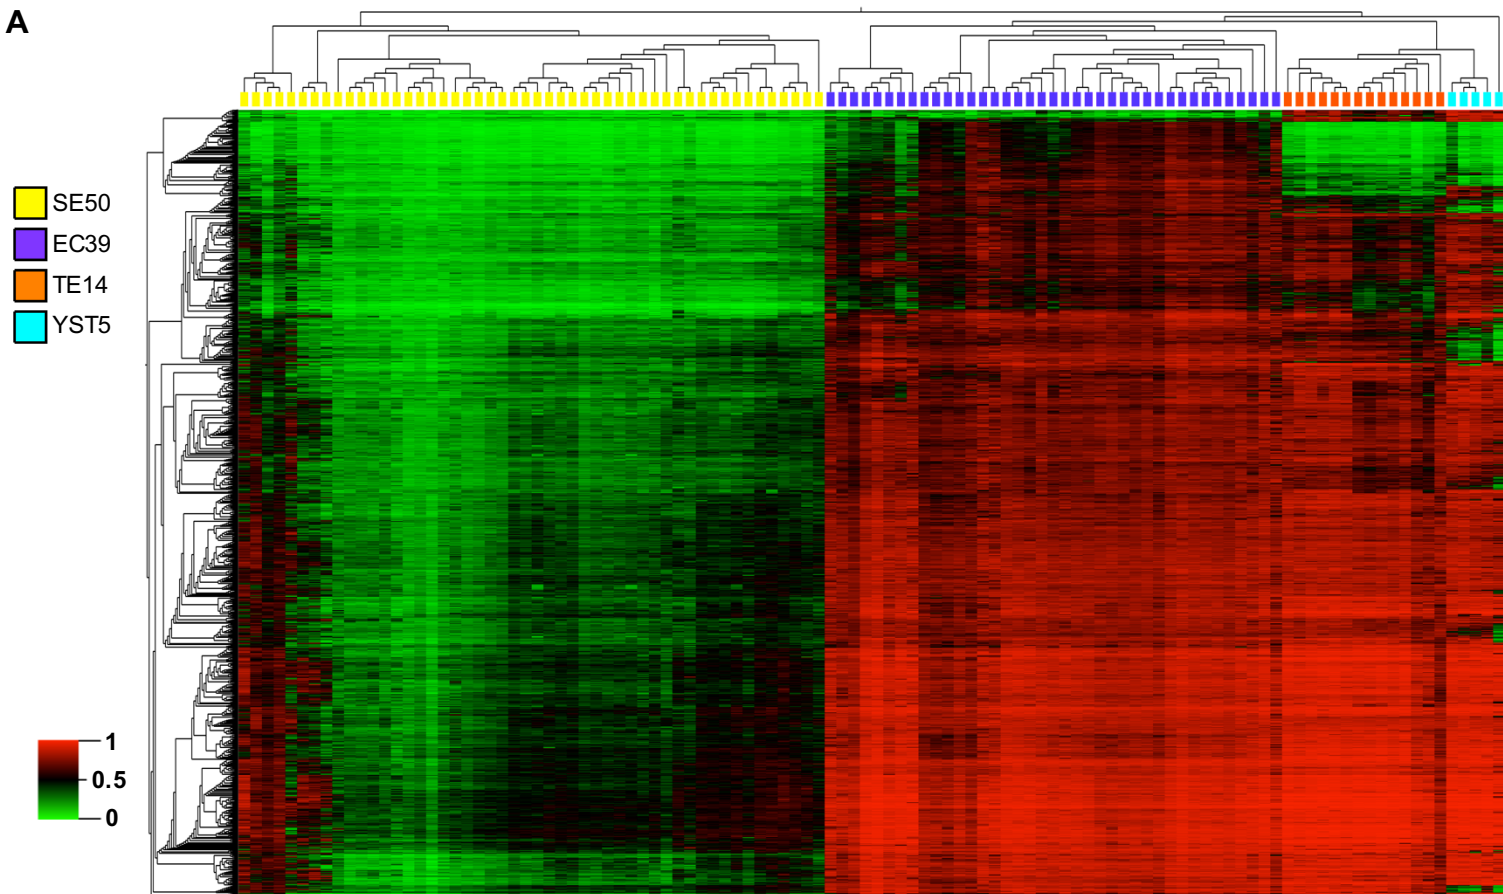**B**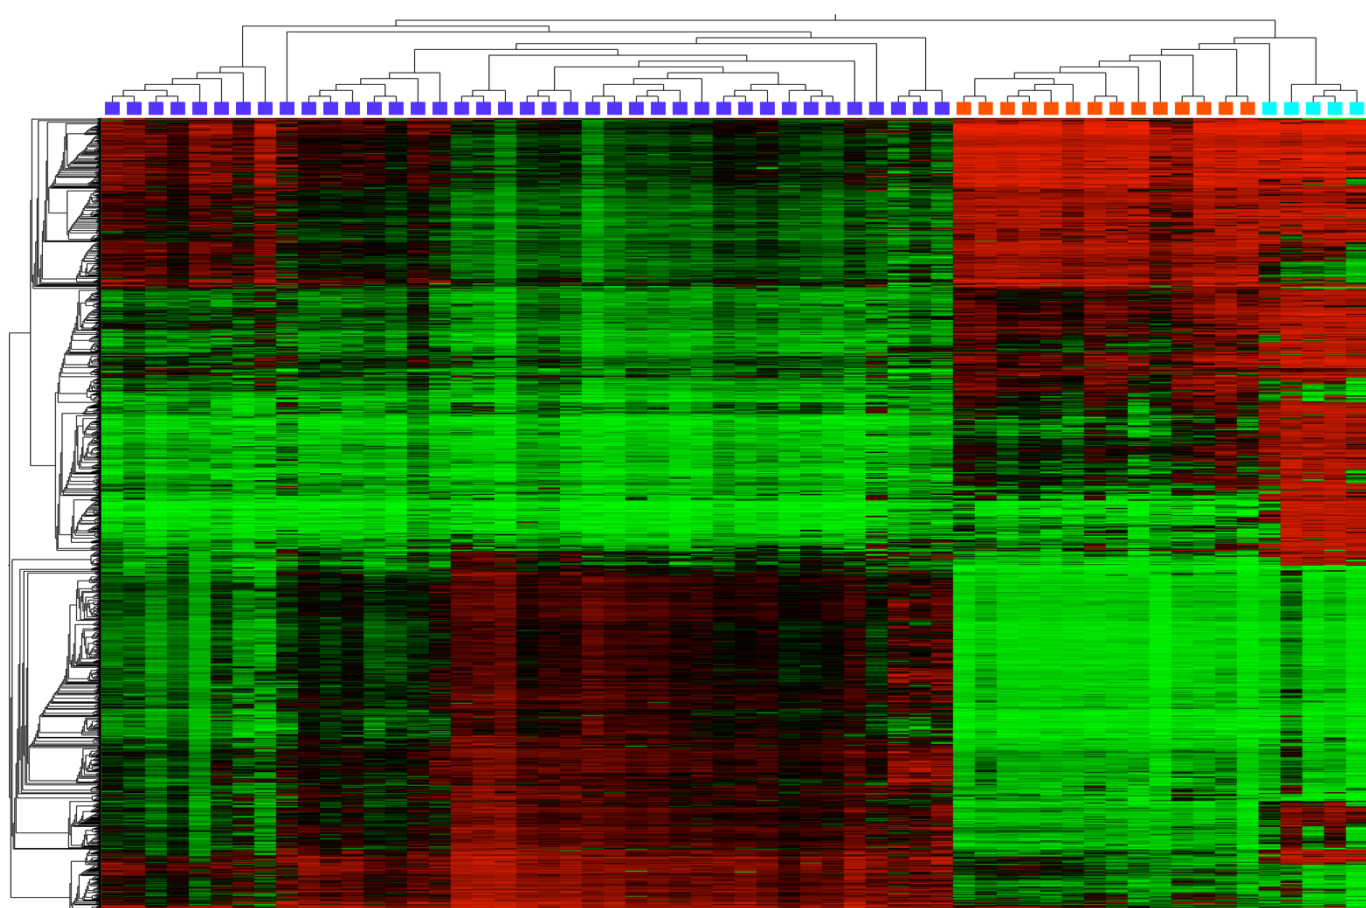

Supplemental Fig. S8. 2-D hierarchical cluster of TGCT subtypes. **A.** All 4 subtypes: variance =0.5, multigroup FDR=1.4e-34, n=1988 differentially methylated targets (DMT). **B.** After excluding SE: variance=0.5,FDR= 5.6e-6,n=2000 DMT. **C.** Difference between the differentiated derivatives of EC, YS and TE: variance=0.5,FDR= 1.367e-5.
