# Supplementary material for: Imprints and DPPA3 are bypassed during pluripotency- and differentiation-coupled methylation reprogramming in testicular germ cell tumors
Source: PubMed Central journal article supplement — Genome Res. 2016 Nov;26(11):1490–504. doi: 10.1101/gr.201293.115 (PMC5088592; doi:10.1101/gr.201293.115), 2016-11
Supplement: supp_gr.201293.115_Supplemental_FigS10.pdf [file supp_gr.201293.115_Supplemental_FigS10.pdf]

## A EC/ESC/iPSC co-hypomethylation module

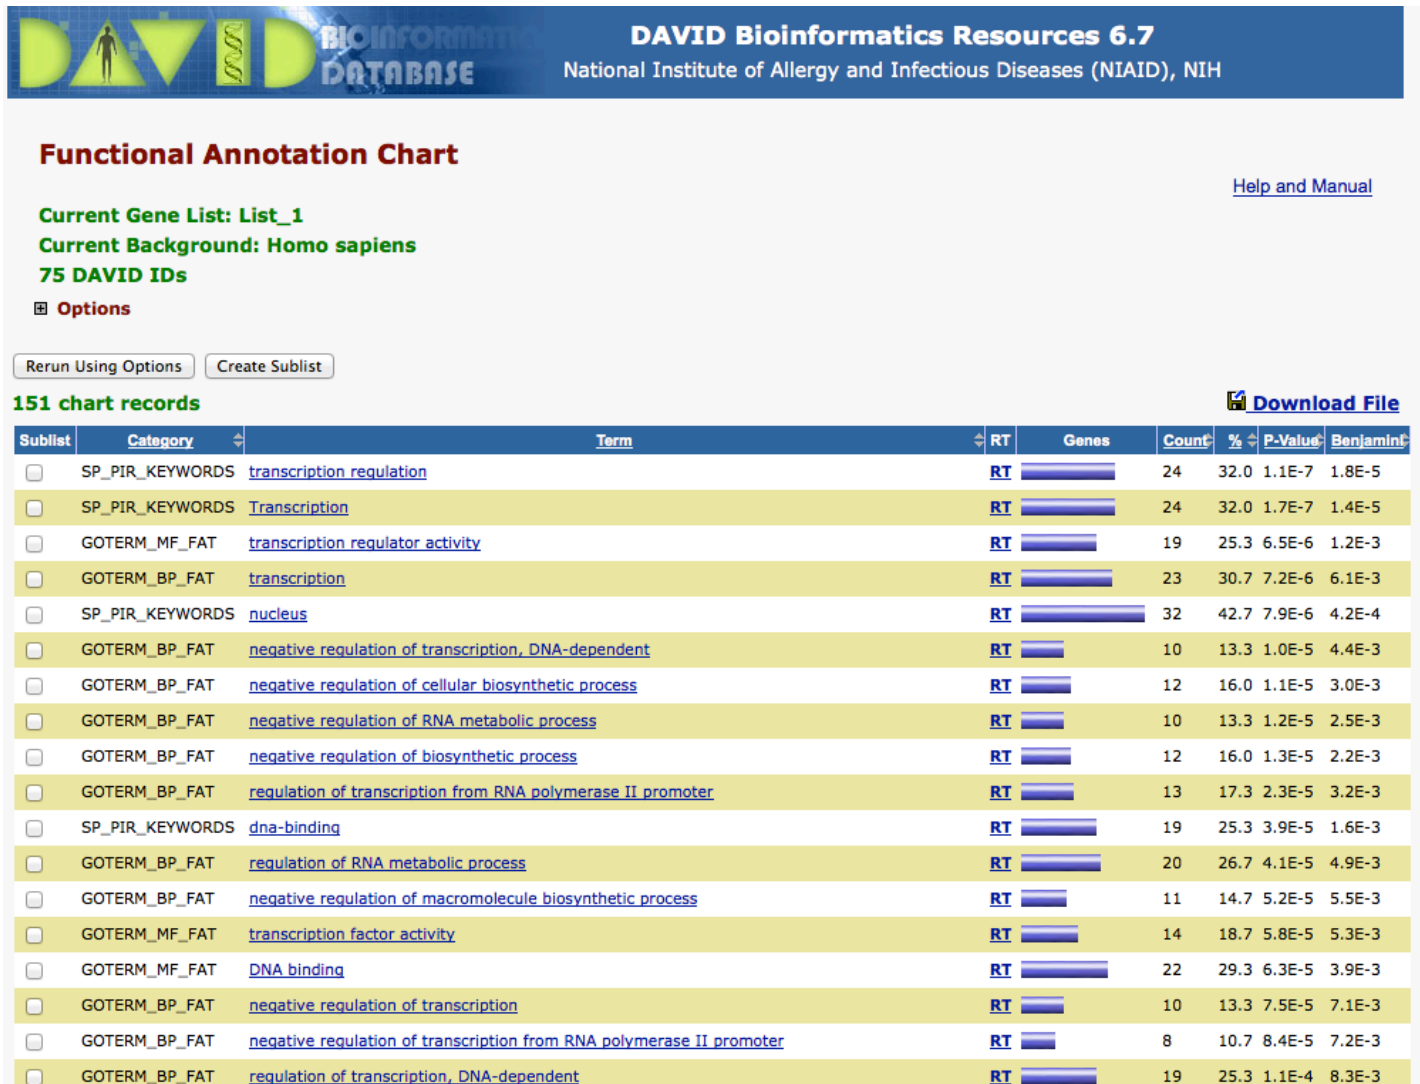

## B EC-unique hypomethylation module

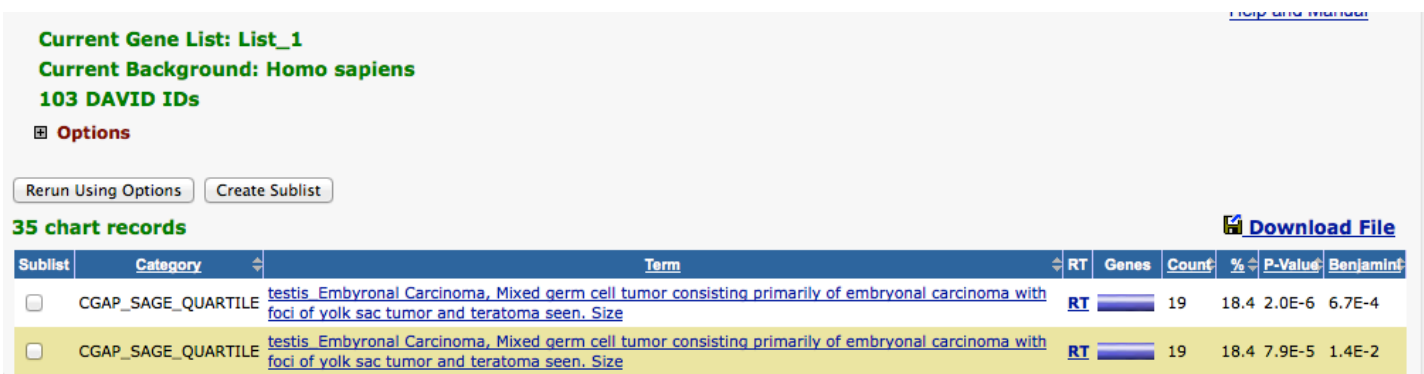

Supplemental Fig. S10. **A:** Functional annotation of the EC-ESC/iPSC co-hypomethylation module of 141 CpG targets mapped to 76 genes revealed significant association with homeobox and cell fate commitment genes (Table S2). **B:** Targets uniquely erased in EC relative to pluripotent references (161 targets mapped to 56 genes) are significantly enriched for genes with upregulated transcription in EC (Table S2).
