# Supplementary material for: Imprints and DPPA3 are bypassed during pluripotency- and differentiation-coupled methylation reprogramming in testicular germ cell tumors
Source: PubMed Central journal article supplement — Genome Res. 2016 Nov;26(11):1490–504. doi: 10.1101/gr.201293.115 (PMC5088592; doi:10.1101/gr.201293.115), 2016-11
Supplement: supp_gr.201293.115_Supplemental_FigS11.pdf [file supp_gr.201293.115_Supplemental_FigS11.pdf]

Figure S11

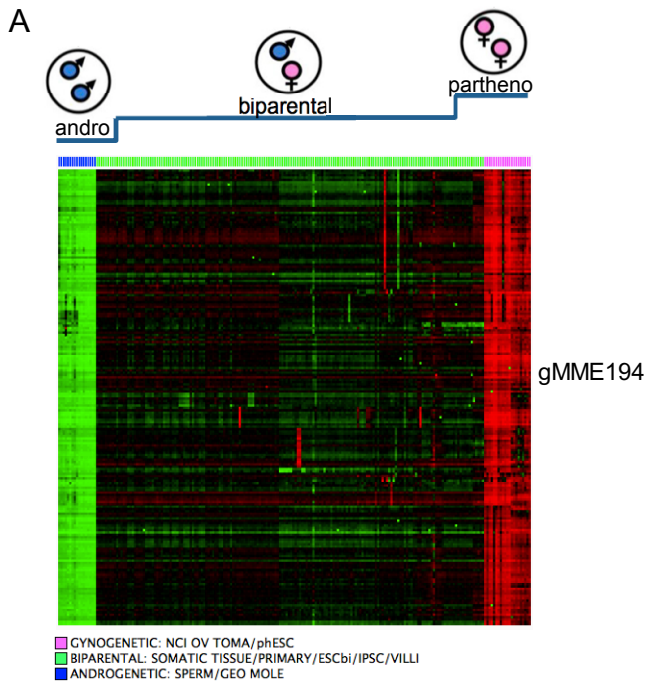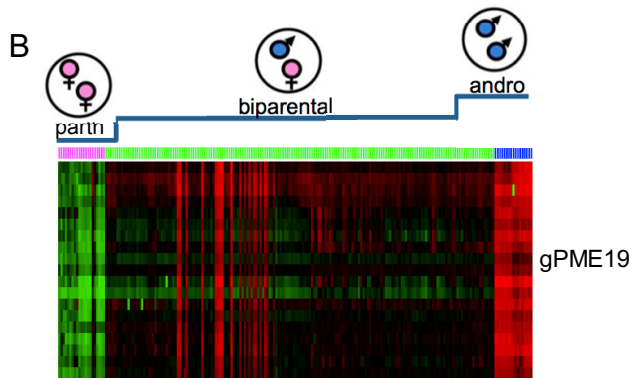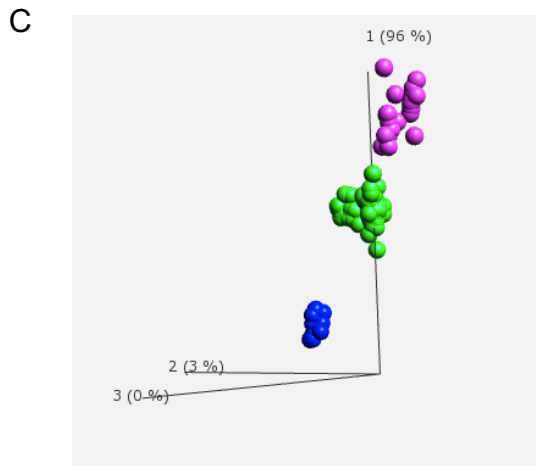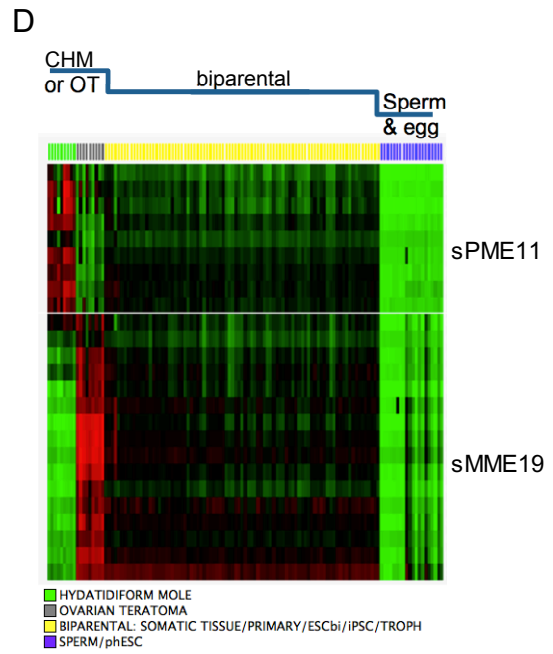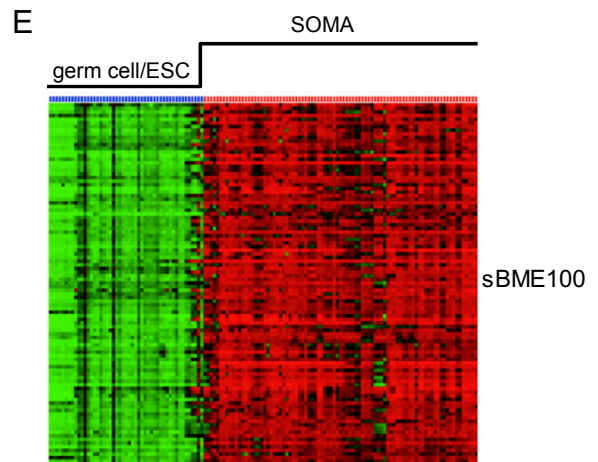

Supplemental Fig. S11. Rank regression analysis of reference androgenote, bi-parental, and gynogenote samples to identify robust imprinted 450K array targets. **A:** germline maternal methylation targets. **B:** germline paternal methylation targets. **C.** PCA shows nearly all variance within somatic tissue methylomes of the union of gMME and gPME modules is captured along male-female germline differential methylation axis. Colors represent samples used in panels **A** and **B**. **D:** Somatic (secondary) paternal and maternal methylation targets. **E:** somatic, *de novo*, parent-independent, biallelic methylated targets.
