# Supplementary material for: Imprints and DPPA3 are bypassed during pluripotency- and differentiation-coupled methylation reprogramming in testicular germ cell tumors
Source: HighWire-hosted journal article supplement (doi:10.1101/gr.201293.115), 2016-10-20
Supplement: Supplemental_Table_S3.xlsx [file Supplemental_Table_S3.xlsx]

## Sheet: sBME100
sBME100	sPME11	sMME19	gMME194	gPME19	LS36	COREHYPER100	COREHYPO39	NSE_DMT2000	EC_ESC_COHYPO141 ("pluri")	EC_HYPO161 ("GCT")	intersection of CpH targets between human and chimp datasets	pluri_diff_neuron mCpH458	mCpH-pluri473
TargetID	TargetID	TargetID	TargetID	TargetID	TargetID	TargetID	TargetID	TargetID	TargetID	TargetID	TargetID	TargetID	TargetID
cg14285365	cg06410284	cg00943909	cg18772071	cg13581483	cg12050271	cg12968518	cg04915173	cg00032912	cg00221709	cg00506862	ch.1.101940785F	ch.1.1047298R	ch.1.1047298R
cg05364072	cg09596866	cg26767990	cg17635114	cg04088212	cg21406271	cg20161976	cg08035151	cg00044796	cg00406319	cg00578645	ch.1.1021960F	ch.1.1073856R	ch.1.1073856R
cg13962153	cg10482201	cg17652507	cg12759554	cg04817190	cg26256263	cg18107697	cg24197477	cg00064415	cg01206418	cg00843538	ch.1.1026209F	ch.1.1168472R	ch.1.1078655R
cg11254532	cg03896694	cg23496597	cg01578057	cg06749854	cg24006721	cg05655647	cg10679346	cg00076195	cg01716527	cg00952162	ch.1.1029351R	ch.1.117057666F	ch.1.113470988R
cg27424906	cg27136643	cg03014008	cg27150681	cg25281616	cg18856478	cg14374754	cg10759572	cg00221709	cg02084214	cg01071265	ch.1.1047298R	ch.1.1187063R	ch.1.1168472R
cg03323953	cg03933495	cg15222215	cg23954636	cg01895612	cg20820767	cg16500605	cg15992730	cg00292029	cg02360445	cg02053451	ch.1.1073856R	ch.1.1248481R	ch.1.1248405R
cg12395259	cg27460547	cg14263118	cg01174175	cg00237904	cg15172734	cg16146432	cg21321768	cg00295794	cg02540440	cg02873525	ch.1.1078655R	ch.1.1249065F	ch.1.1248481R
cg15774864	cg26918062	cg11244758	cg06617468	cg25821896	cg14557185	cg17851604	cg04049542	cg00351804	cg03427577	cg03133378	ch.1.1079286F	ch.1.1254747R	ch.1.1249065F
cg00166234	cg14654875	cg18160880	cg11300971	cg18454954	cg12883279	cg08206623	cg25564144	cg00381755	cg04196143	cg03208044	ch.1.1103899F	ch.1.1262625R	ch.1.1254747R
cg22727572	cg10406676	cg05926269	cg13610072	cg25579157	cg13220900	cg11131384	cg19457237	cg00406319	cg05009605	cg03536745	ch.1.113470988R	ch.1.1391820F	ch.1.1262625R
cg02046665	cg06121207	cg03821543	cg25350411	cg02886509	cg12655375	cg12040201	cg03962846	cg00428457	cg05589489	cg03804609	ch.1.115475395F	ch.1.152821083R	ch.1.1416966F
cg10814803		cg00267746	cg07077459	cg02657360	cg06688763	cg19398112	cg15075897	cg00469814	cg05695959	cg04276938	ch.1.1158789F	ch.1.155658901R	ch.1.152821083R
cg09086380		cg23159236	cg22378065	cg27372170	cg08578641	cg09559189	cg06761873	cg00503383	cg08216684	cg06496786	ch.1.1168472R	ch.1.1697717F	ch.1.1603567F
cg04196143		cg22798925	cg10007452	cg22259242	cg19811337	cg14855519	cg01225779	cg00506862	cg08830565	cg10354655	ch.1.117057666F	ch.1.173201044F	ch.1.161896946R
cg06833102		cg20126878	cg22352234	cg19177307	cg00344445	cg18239431	cg22692843	cg00578645	cg09182733	cg11317705	ch.1.1180380F	ch.1.176851855F	ch.1.1697717F
cg27195956		cg27027803	cg00702231	cg01585333	cg23387569	cg22324567	cg20662169	cg00660167	cg10399099	cg11872186	ch.1.118680314R	ch.1.180325684F	ch.1.173201044F
cg24348110		cg05960039	cg12757684	cg16574793	cg14845962	cg21497990	cg15284457	cg00661970	cg11284842	cg12585222	ch.1.1187063R	ch.1.207058233R	ch.1.173201084F
cg00997338		cg09604333	cg05326984	cg09452478	cg24217894	cg23426473	cg10101533	cg00674679	cg11377827	cg13011999	ch.1.1189675R	ch.1.207365939R	ch.1.173210533F
cg07515271		cg20018057	cg08263357	cg02864690	cg16402452	cg00021256	cg14191244	cg00683332	cg12904957	cg13169073	ch.1.1224902R	ch.1.207470500F	ch.1.173249385R
cg14096744			cg11532302		cg08425810	cg06879226	cg09667806	cg00723994	cg13613450	cg14509299	ch.1.1248405R	ch.1.224723245R	ch.1.191890432F
cg07253829			cg27216384		cg00931644	cg24673742	cg06298190	cg00786747	cg14014098	cg14942863	ch.1.1248481R	ch.1.227329902F	ch.1.228777R
cg00487142			cg17895149		cg09482050	cg21201844	cg16616053	cg00843538	cg14411912	cg15547657	ch.1.1249065F	ch.1.228006015R	ch.1.237398078F
cg01716527			cg12903171		cg19458020	cg09000583	cg20927656	cg00844297	cg14997942	cg15940454	ch.1.1254747R	ch.1.228777R	ch.1.2435132F
cg26166817			cg24977055		cg07357279	cg19057986	cg03208983	cg00941836	cg15169286	cg16240751	ch.1.1262625R	ch.1.250064R	ch.1.250064R
cg01298731			cg19924104		cg08441803	cg17258551	cg17723761	cg00952162	cg17072671	cg17969499	ch.1.1268752F	ch.1.2648414R	ch.1.2554598F
cg11861970			cg27435646		cg17266581	cg23623667	cg24492508	cg00956199	cg17191109	cg18420843	ch.1.1337107R	ch.1.2740682R	ch.1.2648414R
cg17723597			cg01566785		cg14798653	cg16353006	cg19402921	cg01014262	cg17542176	cg18521305	ch.1.1343023F	ch.1.2890615F	ch.1.2740682R
cg14060518			cg05819130		cg22568423	cg00904966	cg06301399	cg01020037	cg17886399	cg19778375	ch.1.1356605F	ch.1.2890724F	ch.1.2890615F
cg26531174			cg10105290		cg22987448	cg16652462	cg13790702	cg01071265	cg18307783	cg22614372	ch.1.1359032F	ch.1.2975077F	ch.1.2890724F
cg25132276			cg19079047		cg15254671	cg17910813	cg22000472	cg01099231	cg18576044	cg23952578	ch.1.1363396R	ch.1.3023296F	ch.1.2975077F
cg05575213			cg02965180		cg17126555	cg10330885	cg01899581	cg01206418	cg19780570	cg24645681	ch.1.1391820F	ch.1.30340112R	ch.1.2988325R
cg17983632			cg05277165		cg21663431	cg05367846	cg03750587	cg01316378	cg20609302	cg25782418	ch.1.1392349R	ch.1.3036304F	ch.1.3023296F
cg02084214			cg13660372		cg08846870	cg14901205	cg02252828	cg01324372	cg20892245	cg26209730	ch.1.1416966F	ch.1.3128389F	ch.1.3036304F
cg08176353			cg06674062		cg15059065	cg00351804	cg00225603	cg01420426	cg21136399	cg26771315	ch.1.1435098R	ch.1.315878R	ch.1.3128389F
cg10571650			cg21778340		cg05258935	cg01047586	cg26538140	cg01516851	cg21197336	cg27360762	ch.1.145732754R	ch.1.32283278R	ch.1.3132707F
cg02341578			cg07921535		cg02798280	cg01605435	cg15873123	cg01600222	cg21204522	cg26465317	ch.1.152821083R	ch.1.3259774R	ch.1.315878R
cg27646230			cg09910998			cg02100602	cg26225655	cg01614102	cg22395335	cg18789472	ch.1.1540554F	ch.1.3348735F	ch.1.32283278R
cg20193839			cg27393730			cg02178763	cg22205501	cg01614237	cg23590389	cg21871803	ch.1.155658901R	ch.1.3571010R	ch.1.3259774R
cg06554036			cg08291000			cg03457729	cg06635871	cg01688536	cg25315819	cg14019348	ch.1.159606180R	ch.1.3571292R	ch.1.3307476R
cg02045894			cg27230044			cg03865648		cg01716527	cg26360026	cg00895174	ch.1.159725313R	ch.1.3571436F	ch.1.3348735F
cg13979884			cg24885794			cg03898631		cg02053451	cg27208467	cg06324957	ch.1.1603567F	ch.1.3642016F	ch.1.3571010R
cg26844909			cg26997085			cg04050824		cg02058408	cg11539055	cg03421440	ch.1.161896946R	ch.1.3651949R	ch.1.3571292R
cg18621142			cg22331138			cg04262140		cg02084214	cg09329621	cg17110559	ch.1.162023970R	ch.1.38337696R	ch.1.3571436F
cg11376341			cg16492735			cg04591032		cg02245004	cg08980987	cg02523263	ch.1.162207702R	ch.1.385573R	ch.1.3587792F
cg12225526			cg09512080			cg04855433		cg02285791	cg15990629	cg19760250	ch.1.162671525R	ch.1.4056800F	ch.1.3642016F
cg06835960			cg00906934			cg04970570		cg02326806	cg01110765	cg06690825	ch.1.1697717F	ch.1.4297661F	ch.1.3651949R
cg25221168			cg26503018			cg05469346		cg02340083	cg11049634	cg04261277	ch.1.172034581R	ch.1.4424447F	ch.1.385573R
cg10046401			cg27120649			cg05672912		cg02360445	cg11143827	cg21885317	ch.1.173201044F	ch.1.4505949F	ch.1.3875151R
cg02360445			cg21771834			cg06316886		cg02367850	cg11620557	cg12059848	ch.1.173201084F	ch.1.4603470R	ch.1.4297470F
cg09317239			cg27001184			cg06371502		cg02391713	cg21010298	cg02544117	ch.1.173210533F	ch.1.4690234F	ch.1.4297661F
cg01077178			cg23342787			cg06457811		cg02434314	cg24156613	cg00446758	ch.1.173249385R	ch.1.4765882F	ch.1.4424447F
cg12616941			cg14873490			cg06971092		cg02447304	cg13515269	cg05612506	ch.1.175985039R	ch.1.5400413R	ch.1.448124R
cg17782713			cg03384175			cg07381634		cg02477557	cg15488978	cg11059944	ch.1.1767330R	ch.1.5843844F	ch.1.4505949F
cg12291654			cg11985632			cg10540626		cg02532971	cg03227338	cg13830870	ch.1.176851855F	ch.1.620704R	ch.1.4603470R
cg15708219			cg13797824			cg12212311		cg02540440	cg27017993	cg17469479	ch.1.179457656R	ch.1.659111R	ch.1.4690234F
cg05124243			cg11175683			cg12934884		cg02571636	cg19373545	cg20098659	ch.1.180325684F	ch.1.705736F	ch.1.4765882F
cg25353064			cg04521244			cg13132370		cg02646515	cg11750112	cg26262442	ch.1.1833767F	ch.1.829344F	ch.1.541122F
cg00406319			cg11562309			cg14284424		cg02683577	cg17124387	cg14228484	ch.1.183610071R	ch.1.839062R	ch.1.587982R
cg22251148			cg18898992			cg14730102		cg02763611	cg02102533	cg19953799	ch.1.186147687F	ch.1.89724558F	ch.1.590396F
cg20360688			cg05096321			cg17278072		cg02766845	cg05004142	cg05053327	ch.1.189720737F	ch.1.928723R	ch.1.658177R
cg01975093			cg19663555			cg19444779		cg02770835	cg27359355	cg08873940	ch.1.191152977F	ch.1.930581F	ch.1.659111R
cg01570480			cg06695761			cg19864705		cg02793828	cg18424208	cg23874145	ch.1.191890432F	ch.1.953398R	ch.1.69949640R
cg15003737			cg21853542			cg20637609		cg02809746	cg25132276	cg21238257	ch.1.193863993R	ch.1.95579934F	ch.1.705736F
cg17003376			cg04634483			cg22994041		cg02813710	cg01510388	cg12506468	ch.1.194336624R	ch.1.95724F	ch.1.829344F
cg10578777			cg09890341			cg23161999		cg02846841	cg13449377	cg03067362	ch.1.194862R	ch.10.1020819F	ch.1.928723R
cg15256492			cg20041873			cg23905164		cg02873525	cg22052056	cg03136712	ch.1.196707923R	ch.10.1117020F	ch.1.930581F
cg20925383			cg04303139			cg24947764		cg02881011	cg26553763	cg27187798	ch.1.198498029R	ch.10.119748781R	ch.1.953398R
cg15389749			cg03436478			cg25987208		cg02963550	cg00487142	cg06761873	ch.1.198578402R	ch.10.131479F	ch.1.95724F
cg02003272			cg05509218			cg26398921		cg03069282	cg07253829	cg10052908	ch.1.200256956R	ch.10.132220714F	ch.10.1024765R
cg01207974			cg22924867			cg00425918		cg03089717	cg14836960	cg25417042	ch.1.201092638F	ch.10.14508944R	ch.10.10942743F
cg23575603			cg01169624			cg03694713		cg03133378	cg18358136	cg00624949	ch.1.201279582R	ch.10.1452314F	ch.10.1117020F
cg21548464			cg03682823			cg10603004		cg03134157	cg03090171	cg17184326	ch.1.207058233R	ch.10.1464434F	ch.10.1271486F
cg08319417			cg18139769			cg13021619		cg03190219	cg10511332	cg21869704	ch.1.207365939R	ch.10.2196322F	ch.10.1452314F
cg05185038			cg12397924			cg13324546		cg03191045	cg13184177	cg03084710	ch.1.207470409R	ch.10.2374052F	ch.10.1464434F
cg00130808			cg22820921			cg14428146		cg03201337	cg11648730	cg05512684	ch.1.207470500F	ch.10.2420334F	ch.10.1683814F
cg26774156			cg07427065			cg14451926		cg03208044	cg13065228	cg16557858	ch.1.2093982R	ch.10.2545310R	ch.10.182900R
cg12123693			cg02501418			cg15854847		cg03268893	cg01275887	cg06177967	ch.1.211138639F	ch.10.2809628F	ch.10.1954609F
cg26314534			cg08229366			cg20892260		cg03324578	cg07076109	cg08464520	ch.1.212120986F	ch.10.296387R	ch.10.1999173F
cg06941557			cg07224147			cg22747746		cg03327619	cg08368520	cg21564289	ch.1.213050838F	ch.10.31807R	ch.10.2186853R
cg03854722			cg27417677			cg17259183		cg03333149	cg14015401	cg19620972	ch.1.217016503F	ch.10.33269R	ch.10.2192687R
cg00014203			cg09003373			cg10364942		cg03370270	cg05355764	cg11481133	ch.1.217627000R	ch.10.704481F	ch.10.2196322F
cg15853812			cg14088957			cg15299832		cg03427577	cg11325578	cg24375465	ch.1.219274665F	ch.10.901771R	ch.10.2545189R
cg22395355			cg06100421			cg25661973		cg03442350	cg12875241	cg13821287	ch.1.220071960R	ch.10.986655R	ch.10.2545310R
cg06269419			cg20297423			cg27028923		cg03536745	cg21258987	cg19170660	ch.1.224723245R	ch.11.102874269F	ch.10.2686225R
cg05384450			cg05369791			cg17329304		cg03607680	cg21983531	cg14514987	ch.1.226360333F	ch.11.110310046R	ch.10.2810236F
cg13584383			cg08734637			cg25485435		cg03682719	cg08746853	cg01545140	ch.1.227099949R	ch.11.1111744F	ch.10.296387R
cg07097310			cg13917504			cg08439930		cg03804609	cg02497558	cg04962027	ch.1.227329902F	ch.11.1112034R	ch.10.31807R
cg14474966			cg25407198			cg27181554		cg03807298	cg19986012	cg11355603	ch.1.228006015R	ch.11.1155333R	ch.10.33269R
cg17124387			cg21667116			cg20755651		cg03858673	cg27656658	cg24540732	ch.1.228777R	ch.11.1215826R	ch.10.704481F
cg10496150			cg23156962			cg21812670		cg03898631	cg02112229	cg07708653	ch.1.2289685F	ch.11.1222938R	ch.10.901771R
cg26287152			cg04678950			cg06148480		cg03901660	cg14484274	cg08880327	ch.1.230734885R	ch.11.125574265R	ch.10.986655R
cg03296204			cg17079325			cg22794704		cg04017479	cg12988813	cg17427986	ch.1.233191923R	ch.11.1299542F	ch.11.1111744F
cg18749563			cg04344875			cg26210445		cg04032962	cg21129729	cg04012872	ch.1.2344685R	ch.11.1405170R	ch.11.1112034R
cg16588649			cg18934293			cg07820868		cg04122873	cg00166234	cg01757586	ch.1.234734F	ch.11.1443191R	ch.11.1147402R
cg08486065			cg00286878			cg16990168		cg04141627	cg02046665	cg04877567	ch.1.2348804F	ch.11.152092R	ch.11.1155333R
cg02859421			cg12347392			cg01175020		cg04166294	cg15774864	cg26253974	ch.1.236086654F	ch.11.1543446R	ch.11.1215826R
cg15662184			cg04786207			cg12118269		cg04180929	cg22727572	cg24776498	ch.1.2369485F	ch.11.1613249R	ch.11.1222898R
cg09277933			cg19386484			cg18419045		cg04196143	cg08327367	cg03366858	ch.1.237398078F	ch.11.1652751R	ch.11.1222938R
cg22052056			cg26708559			cg05693611		cg04276084	cg10242476	cg18202502	ch.1.2378509R	ch.11.1676313F	ch.11.122627362F
cg10941835			cg22705386			cg13540960		cg04276938	cg10619411	cg03208983	ch.1.238173264R	ch.11.17063585R	ch.11.125574265R
			cg06212135					cg04487296	cg13826564	cg04379522	ch.1.2435132F	ch.11.23898073R	ch.11.1299542F
			cg10249538					cg04543938	cg01564640	cg17365367	ch.1.2438240F	ch.11.2527482R	ch.11.130636222R
			cg16823958					cg04645150	cg14285365	cg22504528	ch.1.250064R	ch.11.2725754F	ch.11.1405170R
			cg27338480					cg04741284	cg11201447	cg22470056	ch.1.2541791F	ch.11.2757007R	ch.11.1443191R
			cg09080913					cg04790977	cg10021238	cg14404301	ch.1.2554598F	ch.11.29638519R	ch.11.152092R
			cg13104298					cg04867257	cg15370732	cg22117143	ch.1.2604911R	ch.11.868182R	ch.11.1543446R
			cg07315018					cg04871498	cg10660253	cg03337256	ch.1.2648414R	ch.11.87583764F	ch.11.1613249R
			cg21629528					cg04921315	cg20970752	cg25404597	ch.1.2649807R	ch.11.966965R	ch.11.1652751R
			cg20050761					cg04999637	cg25540142	cg18059223	ch.1.2675516R	ch.11.967412F	ch.11.1676313F
			cg07870293					cg05009605	cg17519645	cg14876043	ch.1.2681285F	ch.11.983092R	ch.11.1810631R
			cg05556276					cg05091238	cg26654770	cg18449187	ch.1.2707897R	ch.12.1121679R	ch.11.2339138R
			cg17580798					cg05165935	cg14469209	cg27191554	ch.1.2740682R	ch.12.1174756R	ch.11.2527482R
			cg05862114					cg05227055	cg24937136	cg17153382	ch.1.2799699R	ch.12.1175666F	ch.11.2725754F
			cg01784351					cg05289920	cg03323953	cg22051345	ch.1.2840814R	ch.12.123150169F	ch.11.444021F
			cg27589003					cg05306070	cg00127198	cg13090596	ch.1.28801127F	ch.12.1274494R	ch.11.60893640F
			cg19344806					cg05308504	cg13564588	cg19592472	ch.1.28801140F	ch.12.1284972R	ch.11.628455R
			cg23714917					cg05398903	cg25425390	cg02801550	ch.1.2890615F	ch.12.131811093R	ch.11.69043358R
			cg21200654					cg05404698	cg13080137	cg27546118	ch.1.2890724F	ch.12.1870160F	ch.11.720675R
			cg25519926					cg05507490	cg19506623	cg05093591	ch.1.2890885R	ch.12.193030F	ch.11.939596F
			cg09462536					cg05534148	cg03408619	cg15601195	ch.1.2975077F	ch.12.1940337R	ch.11.942842R
			cg22592140					cg05575614	cg10941835	cg13428239	ch.1.2988325R	ch.12.2263569F	ch.11.966965R
			cg03588221					cg05583608	cg00102183	cg18026225	ch.1.3023296F	ch.12.2471797R	ch.11.967412F
			cg13986840					cg05589489	cg11313951	cg00043080	ch.1.30340112R	ch.12.28612808R	ch.11.983092R
			cg23312013					cg05695959	cg17185029	cg04018533	ch.1.3036304F	ch.12.41606343F	ch.11.997072R
			cg14952237					cg05809668	cg17092065	cg24492508	ch.1.3042365R	ch.12.50831229F	ch.12.1048628F
			cg05260959					cg05839377	cg26839512	cg01722861	ch.1.3056292F	ch.12.66046708R	ch.12.1121679R
			cg22502459					cg05890377	cg11140086	cg05622550	ch.1.3128389F	ch.12.71498574F	ch.12.1174756R
			cg13713522					cg05895353	cg12220426	cg06070002	ch.1.3132707F	ch.12.74378365R	ch.12.1175666F
			cg27119222					cg05895665	cg09606832	cg10516465	ch.1.315878R	ch.12.7819240R	ch.12.122275046F
			cg00000924					cg05995360	cg21377521	cg27074040	ch.1.3178922R	ch.12.897509F	ch.12.1224713F
			cg11297256					cg06061086	cg27665146	cg19540797	ch.1.32283278R	ch.12.91948412F	ch.12.131811093R
			cg14392746					cg06097423	cg00997338	cg00225603	ch.1.3259774R	ch.12.9379220R	ch.12.132101134F
			cg12077660					cg06143979	cg24348110	cg22788485	ch.1.3280899F	ch.13.102612347R	ch.12.1870160F
			cg03401726					cg06371502	cg25732410	cg18097155	ch.1.3307476R	ch.13.105597677F	ch.12.193030F
			cg16739686					cg06383124	cg27195956	cg07132686	ch.1.3319557F	ch.13.106104868R	ch.12.2081853R
			cg08359167					cg06388647	cg16192751	cg05966641	ch.1.3348735F	ch.13.1182684F	ch.12.2105166R
			cg08446215					cg06496786	cg13860281	cg04686264	ch.1.3439660F	ch.13.1524792R	ch.12.2263569F
			cg26104781					cg06507579	cg06730678	cg11861406	ch.1.3532527F	ch.13.1744822R	ch.12.2471797R
			cg02219360					cg06514078	cg08498836	cg09473763	ch.1.3533065R	ch.13.1783356F	ch.12.2881175F
			cg20699737					cg06545268	cg14482569	cg17876831	ch.1.3533603R	ch.13.1810252F	ch.12.2884971R
			cg26547719					cg06546066	cg17003376	cg03906075	ch.1.3571010R	ch.13.22912778R	ch.12.2884988R
			cg07595203					cg06552563		cg06496272	ch.1.3571292R	ch.13.26730751R	ch.12.897509F
			cg09518720					cg06573787		cg13159929	ch.1.3571436F	ch.13.29539842F	ch.13.112874825F
			cg14958441					cg06604467		cg01225779	ch.1.3577855R	ch.13.32987270F	ch.13.1182684F
			cg27323091					cg06759058		cg14202783	ch.1.3587792F	ch.13.39564907R	ch.13.1354568F
			cg01873334					cg06765217		cg12598767	ch.1.3642016F	ch.13.470465F	ch.13.1448446R
			cg05816130					cg06817490		cg08223771	ch.1.3651949R	ch.13.97330936R	ch.13.1524792R
			cg14243741					cg06823672		cg09676606	ch.1.374405F	ch.14.1056569F	ch.13.1744822R
			cg21137515					cg06960794		cg23108922	ch.1.38337696R	ch.14.1124768F	ch.13.1783356F
			cg05740879					cg07031408		cg13858685	ch.1.385573R	ch.14.1168716F	ch.13.1810252F
			cg01893176					cg07034004		cg15904834	ch.1.38660012F	ch.14.1475328F	ch.13.26730751R
			cg11993252					cg07057434		cg22901100	ch.1.3875151R	ch.14.1755952R	ch.13.268523R
			cg26094482					cg07064495		cg02935351	ch.1.3903344F	ch.14.1823318F	ch.13.504751F
			cg26908876					cg07067452		cg02789515	ch.1.3947147F	ch.14.1824732F	ch.13.52878677F
			cg03422070					cg07096305		cg15326755	ch.1.3958639R	ch.14.21373F	ch.13.531804F
			cg15651941					cg07109453		cg12603453	ch.1.4056800F	ch.14.220543R	ch.13.693633F
			cg25306939					cg07116712		cg00907473	ch.1.4129839F	ch.14.30061788F	ch.13.80513820F
			cg06288089					cg07118796		cg13480614	ch.1.4146056R	ch.14.35518310F	ch.14.1056569F
			cg18253764					cg07124687		cg19102621	ch.1.4190055F	ch.14.35531994F	ch.14.1124768F
			cg26725891					cg07134666		cg10768564	ch.1.422303F	ch.14.37665462F	ch.14.1475328F
			cg22159025					cg07152894		cg21124175	ch.1.4283968F	ch.14.40801112R	ch.14.1755952R
			cg22555495					cg07336350			ch.1.4292830F	ch.14.65485687R	ch.14.1823318F
			cg01614564					cg07382923			ch.1.4297470F	ch.14.689341R	ch.14.1824732F
			cg13073261					cg07505719			ch.1.4297661F	ch.14.809850R	ch.14.21373F
			cg06855497					cg07532183			ch.1.4359995F	ch.14.91718448R	ch.14.220543R
			cg15576576					cg07580591			ch.1.4385290F	ch.14.96436874F	ch.14.624270R
			cg25359645					cg07712892			ch.1.4424447F	ch.14.97331099F	ch.14.63996500F
			cg24607140					cg07902749			ch.1.4459276R	ch.15.1141100F	ch.14.809850R
			cg06000530					cg07939587			ch.1.448124R	ch.15.1220700F	ch.15.1141100F
			cg19617948					cg07989221			ch.1.4505949F	ch.15.1310449F	ch.15.1205307F
			cg15815607					cg08013331			ch.1.4511733R	ch.15.1530357F	ch.15.1220700F
			cg25645178					cg08076807			ch.1.4512450F	ch.15.1632650F	ch.15.1310449F
			cg17840843					cg08094614			ch.1.4544771F	ch.15.1787851R	ch.15.1497565F
			cg02146091					cg08110542			ch.1.4597487F	ch.15.31224719R	ch.15.1525362R
			cg14175568					cg08216684			ch.1.4603470R	ch.15.415873F	ch.15.1530357F
			cg20091959					cg08259514			ch.1.4634054R	ch.15.415980F	ch.15.1632650F
			cg17091610					cg08290675			ch.1.46653973R	ch.15.60937411R	ch.15.1681270R
			cg23626798					cg08347500			ch.1.4690234F	ch.15.64945366R	ch.15.1787851R
			cg15388309					cg08456859			ch.1.4707864F	ch.15.658653F	ch.15.31224719R
			cg16862791					cg08529345			ch.1.471396R	ch.15.663480R	ch.15.38937523R
			cg06446163					cg08535474			ch.1.4765882F	ch.15.91235825F	ch.15.406975R
			cg04984575					cg08614082			ch.1.4784808F	ch.15.979660F	ch.15.415873F
			cg02177317					cg08632164			ch.1.4798357R	ch.16.1230298R	ch.15.415980F
			cg20529070					cg08650910			ch.1.48110560R	ch.16.1235821R	ch.15.492843F
			cg10360552					cg08659204			ch.1.4812384F	ch.16.1296828R	ch.15.62766193F
			cg18911945					cg08716982			ch.1.4819933F	ch.16.13300564R	ch.15.658653F
			cg01877937					cg08719370			ch.1.505031R	ch.16.1357280F	ch.15.663480R
			cg08633313					cg08790676			ch.1.5400413R	ch.16.1486373F	ch.15.72993206F
			cg15330298					cg08830565			ch.1.541122F	ch.16.1565572R	ch.15.73674797F
			cg20252111					cg08860070			ch.1.55746252R	ch.16.1700675R	ch.15.89498F
			cg15302378					cg08873424			ch.1.55941967F	ch.16.192535R	ch.15.91235825F
			cg02472486					cg08889009			ch.1.56581040R	ch.16.48460639F	ch.15.979660F
			cg21625881					cg08977639			ch.1.572291F	ch.16.50203954R	ch.16.1230298R
			cg14203179					cg09064304			ch.1.5843844F	ch.16.51328157R	ch.16.1235821R
								cg09065632			ch.1.58573617F	ch.16.55305377R	ch.16.1296828R
								cg09182733			ch.1.587982R	ch.16.72302375R	ch.16.1357280F
								cg09238332			ch.1.590396F	ch.16.78152474R	ch.16.1486373F
								cg09311683			ch.1.59471444R	ch.16.79494380F	ch.16.1565572R
								cg09402367			ch.1.620704R	ch.16.868576F	ch.16.1700675R
								cg09424006			ch.1.64641599F	ch.16.9041202R	ch.16.192535R
								cg09453103			ch.1.653511R	ch.16.940898F	ch.16.350833F
								cg09504320			ch.1.658177R	ch.16.97779F	ch.16.364290R
								cg09556826			ch.1.659111R	ch.17.1008464R	ch.16.440507F
								cg09619624			ch.1.69277142F	ch.17.1009718F	ch.16.64748135R
								cg09680447			ch.1.69469992R	ch.17.1102270R	ch.16.868576F
								cg09724374			ch.1.69949640R	ch.17.1132347R	ch.16.940898F
								cg09734394			ch.1.705736F	ch.17.1132965F	ch.17.1008464R
								cg09755872			ch.1.81827435R	ch.17.1184801R	ch.17.1009718F
								cg09765089			ch.1.822136R	ch.17.1212751R	ch.17.1102270R
								cg09775533			ch.1.829344F	ch.17.1247542F	ch.17.1131311F
								cg09780180			ch.1.839062R	ch.17.1457304R	ch.17.1132347R
								cg09813769			ch.1.85841987R	ch.17.1508712R	ch.17.1184801R
								cg09839235			ch.1.86649240R	ch.17.1630550R	ch.17.1212751R
								cg09858108			ch.1.876374R	ch.17.1659557F	ch.17.1213878F
								cg09897374			ch.1.88799877F	ch.17.1750110F	ch.17.1247542F
								cg09979478			ch.1.893309F	ch.17.1945262F	ch.17.1348129R
								cg09984047			ch.1.89724558F	ch.17.30079097F	ch.17.1457304R
								cg10018862			ch.1.897769F	ch.17.4249285F	ch.17.1508712R
								cg10024437			ch.1.91396694R	ch.17.45797972F	ch.17.1630550R
								cg10105681			ch.1.928723R	ch.17.53379803R	ch.17.1659557F
								cg10146277			ch.1.930581F	ch.17.655115F	ch.17.1750110F
								cg10176463			ch.1.93237475F	ch.17.67353124R	ch.17.1945262F
								cg10320410			ch.1.93382935F	ch.17.839409R	ch.17.46186719R
								cg10354655			ch.1.95007378R	ch.18.18270R	ch.17.59059R
								cg10380328			ch.1.953398R	ch.18.4153F	ch.17.655115F
								cg10386298			ch.1.95579934F	ch.18.546433R	ch.17.839409R
								cg10393598			ch.1.95642235F	ch.19.1125306R	ch.18.1114073F
								cg10399099			ch.1.95724F	ch.19.1200890F	ch.18.311714R
								cg10504392			ch.1.976694F	ch.19.1271107R	ch.18.4153F
								cg10520349			ch.1.99401238R	ch.19.1306964R	ch.19.103226F
								cg10546219			ch.10.1020819F	ch.19.1348515F	ch.19.1066737F
								cg10626816			ch.10.1024765R	ch.19.1349607R	ch.19.1125306R
								cg10661191			ch.10.1028651F	ch.19.1427912R	ch.19.1200890F
								cg10678427			ch.10.10520798F	ch.19.1633300R	ch.19.12242617R
								cg10689404			ch.10.109266902R	ch.19.16613897R	ch.19.1271107R
								cg10699852			ch.10.10942743F	ch.19.17835377R	ch.19.1306964R
								cg10717691			ch.10.109839658F	ch.19.1922431F	ch.19.1348515F
								cg10739715			ch.10.109847071F	ch.19.21460585R	ch.19.1349607R
								cg10765471			ch.10.1117020F	ch.19.22680R	ch.19.1364541R
								cg10903903			ch.10.113099321F	ch.19.23069876R	ch.19.1427912R
								cg10919664			ch.10.1148322F	ch.19.233112R	ch.19.1633300R
								cg10932018			ch.10.1159788F	ch.19.33613505F	ch.19.16613897R
								cg10967023			ch.10.119748781R	ch.19.565153F	ch.19.1746747F
								cg11012412			ch.10.121850836F	ch.19.683370F	ch.19.17835377R
								cg11083416			ch.10.125213076F	ch.19.714487R	ch.19.1892527R
								cg11206811			ch.10.1271486F	ch.19.714922F	ch.19.1901489F
								cg11235391			ch.10.131479F	ch.19.732135R	ch.19.1922431F
								cg11284842			ch.10.132220714F	ch.19.7675672F	ch.19.22680R
								cg11317705			ch.10.132646605F	ch.2.101965435R	ch.19.233112R
								cg11371748			ch.10.133109453R	ch.2.105901354F	ch.19.565153F
								cg11377827			ch.10.135292R	ch.2.112096485F	ch.19.62825652F
								cg11379081			ch.10.1377861F	ch.2.1159565R	ch.19.683370F
								cg11383134			ch.10.1418365R	ch.2.119267486F	ch.19.714487R
								cg11407741			ch.10.14508944R	ch.2.123910862R	ch.19.714922F
								cg11433672			ch.10.1452314F	ch.2.126989343R	ch.19.732135R
								cg11510586			ch.10.1464434F	ch.2.145681601R	ch.19.820881F
								cg11536474			ch.10.1486890F	ch.2.154349706F	ch.19.931598F
								cg11559162			ch.10.1515233F	ch.2.1546374F	ch.2.1056241F
								cg11584921			ch.10.1676711F	ch.2.16090152F	ch.2.111833563R
								cg11585820			ch.10.1683814F	ch.2.161489025R	ch.2.1123873R
								cg11599539			ch.10.16904721F	ch.2.1701371R	ch.2.1382002F
								cg11726648			ch.10.1700276F	ch.2.170674427F	ch.2.1497140R
								cg11749010			ch.10.17390829F	ch.2.1894803R	ch.2.1546374F
								cg11872186			ch.10.1748644R	ch.2.189510808F	ch.2.166260884R
								cg11878331			ch.10.181390F	ch.2.1916207F	ch.2.1904847R
								cg11883836			ch.10.182900R	ch.2.200609314R	ch.2.1916207F
								cg12004183			ch.10.1853020F	ch.2.2007613R	ch.2.2007613R
								cg12033021			ch.10.1915679F	ch.2.2008119R	ch.2.2008119R
								cg12046867			ch.10.1954609F	ch.2.202877934R	ch.2.202877934R
								cg12085977			ch.10.1963761R	ch.2.207814544R	ch.2.2130426F
								cg12193833			ch.10.1965163R	ch.2.2130426F	ch.2.219167520R
								cg12232778			ch.10.19835876F	ch.2.2134493R	ch.2.224494R
								cg12379383			ch.10.1999173F	ch.2.219167520R	ch.2.2291699F
								cg12405258			ch.10.2007128F	ch.2.22557879F	ch.2.23211351R
								cg12585222			ch.10.202299R	ch.2.229228416R	ch.2.240376F
								cg12630714			ch.10.2027377R	ch.2.240376F	ch.2.25452096R
								cg12646385			ch.10.2028498F	ch.2.2759695R	ch.2.2685596F
								cg12883629			ch.10.20745226R	ch.2.3422646F	ch.2.2759695R
								cg12904957			ch.10.2094808R	ch.2.4251330R	ch.2.3077115F
								cg12911732			ch.10.21102959F	ch.2.42601115R	ch.2.3422646F
								cg13011999			ch.10.2166669R	ch.2.4478726F	ch.2.3493243F
								cg13078911			ch.10.2186853R	ch.2.4483319R	ch.2.3495108F
								cg13130022			ch.10.2192687R	ch.2.4543734F	ch.2.3753920R
								cg13169073			ch.10.2196322F	ch.2.4636382R	ch.2.4034195R
								cg13176778			ch.10.220353F	ch.2.4702687R	ch.2.4366798R
								cg13217661			ch.10.2372731R	ch.2.4964537R	ch.2.4457098R
								cg13298199			ch.10.2374052F	ch.2.65899595R	ch.2.4483319R
								cg13475583			ch.10.2401894F	ch.2.6726424R	ch.2.4489892R
								cg13498757			ch.10.2404278R	ch.2.71774667F	ch.2.4636382R
								cg13547268			ch.10.2414746R	ch.2.797627R	ch.2.4639917R
								cg13613450			ch.10.2420334F	ch.2.80942047R	ch.2.4702687R
								cg13675050			ch.10.2480690F	ch.2.81927627R	ch.2.4963927F
								cg13718418			ch.10.25361452R	ch.2.88242814R	ch.2.4964537R
								cg13729816			ch.10.2545189R	ch.20.1002962F	ch.2.62306258F
								cg13732895			ch.10.2545310R	ch.20.50133246R	ch.2.635363R
								cg13755630			ch.10.2563868F	ch.20.52179737R	ch.2.74109570F
								cg13756768			ch.10.2571788F	ch.20.53118117F	ch.2.74439573R
								cg13785018			ch.10.2595292R	ch.20.54687769F	ch.2.797627R
								cg13790702			ch.10.2609808F	ch.21.17972289F	ch.2.800013F
								cg13836638			ch.10.2686225R	ch.21.228978R	ch.20.1002962F
								cg14014098			ch.10.2774258R	ch.21.25580530F	ch.20.1003652F
								cg14103263			ch.10.27873849F	ch.21.27853252F	ch.20.1436892F
								cg14103680			ch.10.2809628F	ch.21.29704823F	ch.20.1437006F
								cg14131285			ch.10.2810236F	ch.21.35952245R	ch.20.1534602F
								cg14207654			ch.10.290763R	ch.21.377520F	ch.20.52179737R
								cg14241323			ch.10.29498982F	ch.21.39866785R	ch.20.546216F
								cg14262681			ch.10.296387R	ch.21.40139802R	ch.20.577701F
								cg14287022			ch.10.2988224F	ch.21.408866F	ch.20.848555F
								cg14289929			ch.10.30081984F	ch.22.138449R	ch.20.905431R
								cg14294910			ch.10.31370070F	ch.22.149158R	ch.21.114870F
								cg14307693			ch.10.31807R	ch.22.163059F	ch.21.228978R
								cg14318199			ch.10.31962039R	ch.22.22928834R	ch.21.377520F
								cg14411912			ch.10.33269R	ch.22.25752197R	ch.21.408866F
								cg14427437			ch.10.344997F	ch.22.28920330F	ch.21.788740F
								cg14472366			ch.10.345533F	ch.22.33863861F	ch.21.818333F
								cg14509299			ch.10.35929570F	ch.22.40657F	ch.22.138449R
								cg14599729			ch.10.410979F	ch.22.528917R	ch.22.147839R
								cg14637919			ch.10.47925130F	ch.22.707968R	ch.22.149158R
								cg14738806			ch.10.503573F	ch.22.728807R	ch.22.163059F
								cg14765959			ch.10.509007F	ch.22.740407F	ch.22.16454022F
								cg14789818			ch.10.54425967R	ch.22.78028F	ch.22.40657F
								cg14823389			ch.10.58771679R	ch.3.1042115R	ch.22.427671F
								cg14908245			ch.10.5920188R	ch.3.1045756F	ch.22.707968R
								cg14942863			ch.10.622552R	ch.3.1075622R	ch.22.728807R
								cg14964336			ch.10.6339581F	ch.3.1112796R	ch.22.740407F
								cg14979301			ch.10.645342R	ch.3.1135669F	ch.22.78028F
								cg14997942			ch.10.64904690F	ch.3.1245645R	ch.3.1042115R
								cg15030449			ch.10.65169555F	ch.3.1736055R	ch.3.1045756F
								cg15082992			ch.10.65513755F	ch.3.183336F	ch.3.1075622R
								cg15146462			ch.10.65628491F	ch.3.24643237R	ch.3.1112380F
								cg15169286			ch.10.69843199R	ch.3.2560679R	ch.3.1112796R
								cg15203735			ch.10.704481F	ch.3.2787532R	ch.3.1132748F
								cg15222899			ch.10.7244193R	ch.3.343413R	ch.3.1135669F
								cg15384383			ch.10.73329320R	ch.3.3564705F	ch.3.1245645R
								cg15474402			ch.10.736188R	ch.3.3596501R	ch.3.15909166F
								cg15492552			ch.10.756792F	ch.3.373140F	ch.3.183336F
								cg15547657			ch.10.789016R	ch.3.541014R	ch.3.24643237R
								cg15570656			ch.10.79767096R	ch.3.55501R	ch.3.2480551F
								cg15685223			ch.10.818442R	ch.3.638689R	ch.3.2560679R
								cg15822765			ch.10.819441R	ch.3.6830780F	ch.3.343413R
								cg15823502			ch.10.821091F	ch.3.72009955R	ch.3.343688R
								cg15875654			ch.10.844982F	ch.4.1080479F	ch.3.3564705F
								cg15940454			ch.10.845914F	ch.4.111469F	ch.3.3584022R
								cg15967709			ch.10.85407283F	ch.4.1184577R	ch.3.3596501R
								cg16137147			ch.10.89216809R	ch.4.1185987F	ch.3.360440R
								cg16180796			ch.10.896173F	ch.4.125556998F	ch.3.362356R
								cg16187069			ch.10.901771R	ch.4.129827632R	ch.3.373140F
								cg16202331			ch.10.91757602F	ch.4.1501247F	ch.3.44870121R
								cg16207263			ch.10.92313227R	ch.4.154120390F	ch.3.52262431R
								cg16240751			ch.10.95034807F	ch.4.154139216R	ch.3.541014R
								cg16242629			ch.10.96879639F	ch.4.178543248R	ch.3.55501R
								cg16247183			ch.10.983355R	ch.4.179413987F	ch.3.693217R
								cg16275882			ch.10.986655R	ch.4.183293081R	ch.3.81030298R
								cg16280661			ch.10.9918151R	ch.4.194519R	ch.4.1080479F
								cg16293732			ch.11.101068482R	ch.4.27504789F	ch.4.111469F
								cg16303129			ch.11.102874269F	ch.4.3207570F	ch.4.1184577R
								cg16343129			ch.11.10300781R	ch.4.3470285F	ch.4.1185987F
								cg16394018			ch.11.104185765F	ch.4.39131871R	ch.4.123725409F
								cg16399136			ch.11.104643362R	ch.4.60646130F	ch.4.12604R
								cg16424945			ch.11.104819605R	ch.4.79753186F	ch.4.131239304F
								cg16509851			ch.11.104864706F	ch.4.85799582F	ch.4.132387F
								cg16543094			ch.11.109687686R	ch.4.938507R	ch.4.133661909R
								cg16596367			ch.11.110310046R	ch.4.97150F	ch.4.1501247F
								cg16668359			ch.11.110329410F	ch.5.1325793F	ch.4.1707696F
								cg16783204			ch.11.110379701F	ch.5.1992431R	ch.4.1971138F
								cg16810279			ch.11.1111744F	ch.5.2164252F	ch.4.2045280F
								cg16858615			ch.11.1112034R	ch.5.2313526R	ch.4.2917740F
								cg16945186			ch.11.1133244F	ch.5.23452154R	ch.4.3470285F
								cg17029354			ch.11.113826553F	ch.5.236818R	ch.4.39131871R
								cg17072671			ch.11.1147402R	ch.5.240336F	ch.4.43528094R
								cg17101450			ch.11.1155333R	ch.5.2470662F	ch.4.71452R
								cg17191109			ch.11.117308167R	ch.5.2644049F	ch.4.73985647R
								cg17222685			ch.11.1197632F	ch.5.3491617R	ch.4.85799582F
								cg17244485			ch.11.1209891F	ch.5.37985537F	ch.4.938507R
								cg17311587			ch.11.1215826R	ch.5.409282R	ch.4.97150F
								cg17344321			ch.11.1222898R	ch.5.432310R	ch.5.1325793F
								cg17392573			ch.11.1222938R	ch.5.52554191R	ch.5.1339988F
								cg17410412			ch.11.122627362F	ch.5.5396883R	ch.5.1992431R
								cg17425810			ch.11.125574265R	ch.5.627424R	ch.5.2164252F
								cg17428559			ch.11.1299542F	ch.5.96698337R	ch.5.236818R
								cg17521583			ch.11.130409386F	ch.5.97862610R	ch.5.240336F
								cg17542176			ch.11.130636222R	ch.6.107549394R	ch.5.2444790R
								cg17573301			ch.11.130657691R	ch.6.113866684R	ch.5.2470662F
								cg17598339			ch.11.1352825R	ch.6.115952F	ch.5.2607995R
								cg17757602			ch.11.1353882R	ch.6.122375039R	ch.5.2644049F
								cg17759274			ch.11.1369160F	ch.6.168367002R	ch.5.2819146F
								cg17819264			ch.11.13809260R	ch.6.169008488F	ch.5.3304132F
								cg17886399			ch.11.1405170R	ch.6.1693624F	ch.5.3491617R
								cg17969499			ch.11.1416715R	ch.6.20150281F	ch.5.68282404R
								cg18090004			ch.11.1421098F	ch.6.2380480F	ch.5.696714R
								cg18161327			ch.11.1434436R	ch.6.2680060R	ch.5.73958282R
								cg18197377			ch.11.1435292F	ch.6.2893423F	ch.5.884579R
								cg18307783			ch.11.1443191R	ch.6.3091160R	ch.5.92314382F
								cg18333921			ch.11.152092R	ch.6.3276431R	ch.5.96698337R
								cg18334881			ch.11.1543446R	ch.6.33611621F	ch.6.1385876F
								cg18419271			ch.11.1613249R	ch.6.499655F	ch.6.1541695F
								cg18420843			ch.11.1623093R	ch.6.51066775R	ch.6.1693624F
								cg18456523			ch.11.1652751R	ch.6.698823R	ch.6.2146758R
								cg18471993			ch.11.167001F	ch.6.775158F	ch.6.2600249F
								cg18514573			ch.11.1676313F	ch.6.839713R	ch.6.2623783F
								cg18521305			ch.11.1684505R	ch.7.1039544R	ch.6.2625594F
								cg18576044			ch.11.1702122F	ch.7.107350695F	ch.6.2680060R
								cg18623980			ch.11.17063585R	ch.7.111787F	ch.6.2771202R
								cg18639615			ch.11.1810631R	ch.7.116679792R	ch.6.2893423F
								cg18715236			ch.11.1823407F	ch.7.122671817R	ch.6.2958553R
								cg18850112			ch.11.1835930F	ch.7.1578169F	ch.6.3091160R
								cg18910298			ch.11.1966376F	ch.7.2068158F	ch.6.3354773R
								cg19047660			ch.11.2004977F	ch.7.2116294F	ch.6.34361150R
								cg19317211			ch.11.2007778R	ch.7.2254086F	ch.6.37043690R
								cg19430537			ch.11.2015773F	ch.7.22672050F	ch.6.41978480R
								cg19540943			ch.11.2040533F	ch.7.2714749F	ch.6.467964R
								cg19578835			ch.11.2134397R	ch.7.288614R	ch.6.698823R
								cg19598567			ch.11.2136200F	ch.7.2902493F	ch.6.775158F
								cg19663861			ch.11.2339138R	ch.7.33727552F	ch.6.839713R
								cg19716433			ch.11.23898073R	ch.7.42690727F	ch.7.1039544R
								cg19737787			ch.11.2451667R	ch.7.44221780F	ch.7.107350695F
								cg19778375			ch.11.2510309R	ch.7.558423R	ch.7.111787F
								cg19780570			ch.11.2527482R	ch.7.67314344F	ch.7.128681R
								cg19849728			ch.11.25488742R	ch.7.735851R	ch.7.130270068F
								cg19859290			ch.11.2619180F	ch.8.1022548F	ch.7.140683712R
								cg19871940			ch.11.2683828R	ch.8.1083168R	ch.7.1578169F
								cg19889626			ch.11.2720214F	ch.8.1234861F	ch.7.2068158F
								cg19922871			ch.11.2725754F	ch.8.128185533F	ch.7.2116294F
								cg20091795			ch.11.2738269F	ch.8.128576863F	ch.7.2182816F
								cg20092531			ch.11.2757007R	ch.8.131640933F	ch.7.2185748R
								cg20450471			ch.11.2757508R	ch.8.140049216F	ch.7.2254086F
								cg20491579			ch.11.29638519R	ch.8.1439749R	ch.7.2660938R
								cg20609302			ch.11.310923R	ch.8.18329843R	ch.7.2714749F
								cg20661138			ch.11.319992F	ch.8.20603847F	ch.7.2773799F
								cg20691507			ch.11.339559F	ch.8.2465681F	ch.7.288614R
								cg20699586			ch.11.38650081F	ch.8.314562F	ch.7.2902493F
								cg20839206			ch.11.40793829R	ch.8.54249749F	ch.7.3114411F
								cg20892245			ch.11.41377569F	ch.8.61455948R	ch.7.41200093F
								cg20894640			ch.11.444021F	ch.8.81283154R	ch.7.44221780F
								cg20909645			ch.11.50107818R	ch.8.89640933F	ch.7.558423R
								cg20918393			ch.11.535384R	ch.8.91747740F	ch.7.592198R
								cg21128568			ch.11.60893640F	ch.8.91748119F	ch.7.735851R
								cg21136399			ch.11.61132480F	ch.8.9261340R	ch.8.1022548F
								cg21197336			ch.11.628455R	ch.8.93711588R	ch.8.1083168R
								cg21204522			ch.11.655175F	ch.9.103369821R	ch.8.1234861F
								cg21251385			ch.11.69043358R	ch.9.1078185R	ch.8.1357995R
								cg21255942			ch.11.691621F	ch.9.1104901R	ch.8.1439749R
								cg21293562			ch.11.71909907R	ch.9.1116984R	ch.8.1812887R
								cg21304498			ch.11.720675R	ch.9.1117114R	ch.8.1960908F
								cg21330949			ch.11.721876F	ch.9.1241711R	ch.8.2087691R
								cg21449229			ch.11.80815632F	ch.9.1470405F	ch.8.2343166R
								cg21545862			ch.11.838495R	ch.9.2223115R	ch.8.2465681F
								cg21549195			ch.11.868182R	ch.9.2262725R	ch.8.25340112R
								cg21606928			ch.11.87583764F	ch.9.2298007R	ch.8.2842146R
								cg21687740			ch.11.91116131R	ch.9.2473665R	ch.8.314562F
								cg21762788			ch.11.91717525F	ch.9.28950438F	ch.8.669769F
								cg22044028			ch.11.91906385F	ch.9.76081330F	ch.8.7249R
								cg22082046			ch.11.930275R	ch.9.77250961R	ch.8.74124882F
								cg22108469			ch.11.939596F	ch.9.7776528F	ch.8.90781826R
								cg22114489			ch.11.942842R	ch.9.84051654F	ch.9.1009386R
								cg22121557			ch.11.94541071R	ch.9.90287778F	ch.9.103369821R
								cg22158650			ch.11.962980R	ch.9.93402636R	ch.9.1116984R
								cg22178798			ch.11.966965R	ch.9.98959675F	ch.9.1117114R
								cg22186831			ch.11.967412F		ch.9.1169222R
								cg22395335			ch.11.96774805R		ch.9.1241711R
								cg22614372			ch.11.975705R		ch.9.1470405F
								cg22686132			ch.11.97728705F		ch.9.1539394R
								cg22732101			ch.11.983092R		ch.9.1976398F
								cg22840361			ch.11.997072R		ch.9.2262725R
								cg22985595			ch.12.1019410F		ch.9.2298007R
								cg23006567			ch.12.1023240F		ch.9.2473665R
								cg23044005			ch.12.1038646R		ch.9.2793549R
								cg23192683			ch.12.104817561R		ch.9.28950438F
								cg23244910			ch.12.1048628F		ch.9.377428R
								cg23252259			ch.12.104929702R		ch.9.898515R
								cg23274912			ch.12.105153690R		ch.9.90287778F
								cg23342718			ch.12.109182886F		ch.9.98957343R
								cg23445114			ch.12.1107853R		ch.9.991104F
								cg23476877			ch.12.1121679R
								cg23525438			ch.12.114140863R
								cg23590389			ch.12.1171804F
								cg23850174			ch.12.1173053R
								cg23952578			ch.12.1174756R
								cg24033871			ch.12.1175666F
								cg24114014			ch.12.1181547R
								cg24126967			ch.12.1183517F
								cg24128931			ch.12.1204902R
								cg24157892			ch.12.121680993R
								cg24166450			ch.12.122275046F
								cg24187351			ch.12.1224713F
								cg24369185			ch.12.123150169F
								cg24471073			ch.12.124321348F
								cg24495585			ch.12.12432R
								cg24594979			ch.12.1274494R
								cg24645681			ch.12.1284972R
								cg24690054			ch.12.129703717R
								cg24846199			ch.12.131811093R
								cg24860169			ch.12.132101134F
								cg24879782			ch.12.13534453R
								cg24886257			ch.12.13976R
								cg24936799			ch.12.1441382R
								cg25220896			ch.12.1531371R
								cg25315819			ch.12.1569034F
								cg25351606			ch.12.1574978R
								cg25453677			ch.12.158852F
								cg25461801			ch.12.1637510F
								cg25508679			ch.12.16553146F
								cg25757115			ch.12.1667570F
								cg25778892			ch.12.1700408R
								cg25782418			ch.12.1870160F
								cg25858132			ch.12.190393R
								cg25895971			ch.12.19126263F
								cg25916282			ch.12.1928258R
								cg26033520			ch.12.193030F
								cg26209730			ch.12.1940337R
								cg26257082			ch.12.19627204F
								cg26267430			ch.12.1983124R
								cg26343001			ch.12.1993261F
								cg26360026			ch.12.2010372R
								cg26518861			ch.12.2081853R
								cg26620530			ch.12.2105166R
								cg26669897			ch.12.2130406F
								cg26771315			ch.12.2222572R
								cg26827987			ch.12.2263569F
								cg26863534			ch.12.2284240F
								cg26947626			ch.12.2471797R
								cg27068619			ch.12.2473323R
								cg27080194			ch.12.2480290F
								cg27125849			ch.12.2487434F
								cg27182351			ch.12.2506678F
								cg27208467			ch.12.2515819F
								cg27209741			ch.12.2537364F
								cg27336587			ch.12.2538228F
								cg27360762			ch.12.2545474F
								cg27404023			ch.12.2571969F
								cg27411712			ch.12.2579909R
								cg27414868			ch.12.2583928F
								cg27432864			ch.12.2586863F
								cg27464846			ch.12.2625550F
								cg27522573			ch.12.2647993F
								cg27582017			ch.12.2759882R
								cg27636310			ch.12.28612808R
								cg27658416			ch.12.2881175F
								cg27659049			ch.12.2884971R
								cg27664085			ch.12.2884988R
								ch.1.1189675R			ch.12.2890353F
								ch.1.1435098R			ch.12.2920490F
								ch.1.145732754R			ch.12.2922115F
								ch.1.180997836R			ch.12.29232229R
								ch.1.198498029R			ch.12.292758R
								ch.1.32283278R			ch.12.29902758F
								ch.1.46653973R			ch.12.29939875F
								ch.10.125213076F			ch.12.313305F
								ch.10.130844938F			ch.12.41530717F
								ch.10.2676717R			ch.12.41606343F
								ch.10.2760753F			ch.12.447036F
								ch.10.96354720R			ch.12.45348862R
								ch.11.1443191R			ch.12.46508471F
								ch.11.2339138R			ch.12.49617489F
								ch.12.121680993R			ch.12.50831229F
								ch.12.122275046F			ch.12.561130F
								ch.13.1834088F			ch.12.57736122F
								ch.13.26730751R			ch.12.57770130R
								ch.13.36227054R			ch.12.58754139R
								ch.13.654879R			ch.12.58871400F
								ch.14.35518310F			ch.12.602695F
								ch.15.72993206F			ch.12.61764592R
								ch.15.77744308R			ch.12.66001376R
								ch.15.865366R			ch.12.66046708R
								ch.16.1306578F			ch.12.679484R
								ch.16.364290R			ch.12.706878F
								ch.17.1679671R			ch.12.71364637R
								ch.17.230463R			ch.12.71498574F
								ch.17.30079097F			ch.12.74372425F
								ch.17.33847170F			ch.12.74378365R
								ch.17.49517645R			ch.12.74463574F
								ch.17.49953103R			ch.12.74620632F
								ch.17.839409R			ch.12.7819240R
								ch.18.265776F			ch.12.78487561F
								ch.19.16251119F			ch.12.827006R
								ch.19.16613897R			ch.12.859106F
								ch.19.1787100F			ch.12.868326R
								ch.2.1730502R			ch.12.88942289F
								ch.2.199792288R			ch.12.897509F
								ch.2.202877934R			ch.12.902977F
								ch.2.225756826F			ch.12.90545295R
								ch.2.2729437F			ch.12.91948412F
								ch.2.3330114R			ch.12.921239R
								ch.2.3504351F			ch.12.9379220R
								ch.21.19455351R			ch.12.96843545R
								ch.21.33444458F			ch.12.973812R
								ch.21.820555F			ch.13.100003653F
								ch.22.44116734F			ch.13.102612347R
								ch.3.2741911R			ch.13.104351702F
								ch.3.97157383F			ch.13.105597677F
								ch.4.1098158R			ch.13.106104868R
								ch.4.68771941F			ch.13.1070180R
								ch.4.85799582F			ch.13.1078047F
								ch.5.36486227R			ch.13.1081090R
								ch.5.53208672R			ch.13.1085822R
								ch.5.6287987R			ch.13.108698836F
								ch.5.682918R			ch.13.1109452R
								ch.5.696714R			ch.13.1117341F
								ch.5.83804089R			ch.13.112874825F
								ch.6.1206704R			ch.13.1149345F
								ch.6.1841262F			ch.13.1154960F
								ch.6.20366279F			ch.13.1159947F
								ch.6.573831F			ch.13.116017F
								ch.6.94606978F			ch.13.1182684F
								ch.7.1140112F			ch.13.1354568F
								ch.7.1701599F			ch.13.1437856R
								ch.7.288614R			ch.13.1448446R
								ch.7.398127F			ch.13.1524792R
								ch.7.44221780F			ch.13.166775F
								ch.7.45985950F			ch.13.1744822R
								ch.7.990472R			ch.13.1783356F
								ch.8.1011566R			ch.13.1810252F
								ch.8.104563527R			ch.13.1834088F
								ch.8.137615416R			ch.13.22443791R
								ch.8.68461758R			ch.13.22912778R
								ch.8.68960677R			ch.13.233184R
								ch.8.870369R			ch.13.26730751R
								ch.9.113042395R			ch.13.268523R
								ch.X.1639000R			ch.13.29539842F
								ch.X.23343928R			ch.13.30339786R
								ch.X.56864533F			ch.13.32987270F
								ch.X.68408155R			ch.13.34404418F
								cg02633924			ch.13.356781R
								cg04650676			ch.13.36227054R
								cg25416067			ch.13.36776443F
								ch.16.1565572R			ch.13.37580793F
								ch.4.1169037R			ch.13.381084F
								cg15665342			ch.13.38799509F
								ch.17.2196713R			ch.13.39564907R
								cg02501120			ch.13.40199926R
								ch.3.3584022R			ch.13.43576588R
								ch.15.1525362R			ch.13.45374264R
								cg13352717			ch.13.470465F
								cg10754215			ch.13.504751F
								cg17949969			ch.13.50754963R
								cg04576568			ch.13.50757403R
								cg17610929			ch.13.52878677F
								cg18395327			ch.13.531804F
								cg24743778			ch.13.53330881F
								ch.9.377428R			ch.13.53841817R
								cg04156293			ch.13.54163749F
								cg10266490			ch.13.54449778R
								cg21527621			ch.13.568598F
								ch.6.609614F			ch.13.601939F
								cg02328793			ch.13.628550F
								ch.1.234734F			ch.13.639148F
								cg26465317			ch.13.650435R
								cg01602621			ch.13.654879R
								cg04566159			ch.13.67938274F
								cg08599448			ch.13.693633F
								cg12216208			ch.13.75704157F
								ch.11.2619180F			ch.13.76200044F
								cg23676480			ch.13.774712F
								ch.12.1637510F			ch.13.78755175F
								cg05475524			ch.13.79675484F
								cg12193731			ch.13.80303670F
								cg04838832			ch.13.80513820F
								cg22753661			ch.13.80601193R
								cg02518691			ch.13.81021746R
								cg04513549			ch.13.82544114F
								cg17861863			ch.13.85057763F
								ch.5.240336F			ch.13.88042475R
								cg10177032			ch.13.89329433R
								cg22275864			ch.13.90643811R
								cg20359930			ch.13.90716753R
								cg18789472			ch.13.914371F
								cg09248054			ch.13.929593F
								cg24474852			ch.13.97330936R
								ch.1.4947900R			ch.14.100067392F
								cg21871803			ch.14.1056569F
								cg01987417			ch.14.1097636R
								cg03604011			ch.14.1124768F
								cg02837536			ch.14.1168716F
								ch.17.1457304R			ch.14.1187653R
								cg17594860			ch.14.1202311F
								ch.3.1135669F			ch.14.1202858F
								ch.2.740763F			ch.14.1254509R
								cg03781931			ch.14.1452150F
								cg13916459			ch.14.1475328F
								cg16413687			ch.14.1488981R
								cg02548132			ch.14.1499103R
								cg19537719			ch.14.1558261F
								ch.19.1066737F			ch.14.1755952R
								cg03014326			ch.14.1783623F
								ch.20.221631R			ch.14.1795106F
								cg07338782			ch.14.1823318F
								cg11539055			ch.14.1824732F
								cg23735712			ch.14.190588F
								cg03667968			ch.14.21373F
								cg22035501			ch.14.220543R
								cg21962450			ch.14.25359861F
								cg24628076			ch.14.25380199R
								cg06791102			ch.14.25380211R
								cg06516947			ch.14.270578R
								cg27321750			ch.14.297819F
								cg05099464			ch.14.30061788F
								ch.6.3068315F			ch.14.34005785F
								ch.12.921239R			ch.14.35518310F
								cg15790037			ch.14.35531994F
								ch.6.2134092F			ch.14.37665462F
								cg05699806			ch.14.39207337F
								cg20452714			ch.14.39253217F
								cg19601636			ch.14.40801112R
								cg14831665			ch.14.427606F
								ch.8.2599852F			ch.14.43720575R
								cg14019348			ch.14.471449F
								ch.1.3023296F			ch.14.50884044F
								cg05267394			ch.14.50896903F
								cg16440058			ch.14.52809496F
								cg16655240			ch.14.53082129F
								cg10038250			ch.14.53585675F
								ch.2.635363R			ch.14.55428957F
								cg07986385			ch.14.560311R
								cg17532976			ch.14.624270R
								ch.2.4702176R			ch.14.628538R
								cg08021025			ch.14.63996500F
								cg26337070			ch.14.65485687R
								cg19548524			ch.14.68209562R
								cg21504961			ch.14.68214257F
								ch.1.3947147F			ch.14.689341R
								cg00733683			ch.14.71046539R
								ch.12.1121679R			ch.14.71061373R
								ch.X.1171704R			ch.14.782543R
								cg11228682			ch.14.783201F
								ch.8.2102814R			ch.14.809850R
								cg16744531			ch.14.81957238R
								ch.12.13976R			ch.14.83852056F
								cg09329621			ch.14.849914F
								cg08724310			ch.14.91718448R
								cg08980987			ch.14.92683308R
								cg15990629			ch.14.93511233R
								cg20342079			ch.14.955325R
								cg20399616			ch.14.95739172F
								cg22229906			ch.14.96436874F
								cg10147375			ch.14.97331099F
								ch.2.1382002F			ch.14.98380799F
								cg02224314			ch.15.1087158F
								cg18166947			ch.15.1141100F
								cg24720583			ch.15.1166704F
								cg10020892			ch.15.1197129R
								cg17465631			ch.15.1205307F
								cg01110765			ch.15.1220700F
								cg11049634			ch.15.1310449F
								cg11143827			ch.15.1354287F
								cg11620557			ch.15.1428309R
								cg21010298			ch.15.1454355R
								cg24156613			ch.15.1458091R
								cg27558057			ch.15.1497565F
								cg00895174			ch.15.1525362R
								cg04039555			ch.15.1530357F
								cg13515269			ch.15.1538350R
								cg08328513			ch.15.1556816R
								cg08039583			ch.15.1582754F
								cg08075204			ch.15.1606867R
								cg10590292			ch.15.1632650F
								cg12353452			ch.15.1681270R
								cg14556909			ch.15.1787851R
								cg24749672			ch.15.23721785F
								cg18448570			ch.15.23774000R
								cg06324957			ch.15.25649867R
								ch.10.986655R			ch.15.292390F
								cg03136151			ch.15.31224719R
								cg03421440			ch.15.327351R
								cg09250199			ch.15.32812813R
								cg18039789			ch.15.33192669F
								cg10678018			ch.15.33220631R
								ch.21.551062R			ch.15.35812004F
								ch.21.551389R			ch.15.37208706R
								ch.10.1947223F			ch.15.38229170R
								cg00902496			ch.15.38937523R
								ch.1.2289685F			ch.15.403279R
								cg04744755			ch.15.406975R
								cg19729116			ch.15.415873F
								ch.2.2322307F			ch.15.415980F
								ch.7.2086776R			ch.15.429642R
								ch.10.2571788F			ch.15.433532F
								cg15488978			ch.15.44425730F
								cg03227338			ch.15.46384616R
								ch.11.975705R			ch.15.46395492R
								cg08368973			ch.15.465126R
								cg17110559			ch.15.47805190R
								cg02523263			ch.15.492843F
								cg27017993			ch.15.507483F
								cg07139509			ch.15.59620222F
								cg25088009			ch.15.600374F
								cg16452361			ch.15.60937411R
								cg13556511			ch.15.61175060F
								cg14292280			ch.15.62766193F
								cg05173913			ch.15.62796485F
								cg15236528			ch.15.64945366R
								cg00679711			ch.15.658653F
								cg12374721			ch.15.65986670F
								cg19760250			ch.15.663480R
								cg19817652			ch.15.72993206F
								cg20084219			ch.15.73674797F
								ch.18.316502R			ch.15.74293042R
								cg06440065			ch.15.75593923F
								cg00330929			ch.15.75815792R
								cg05887082			ch.15.76992553F
								cg01556075			ch.15.77744308R
								ch.19.732135R			ch.15.79573225R
								cg06690825			ch.15.811911R
								cg00164949			ch.15.814613R
								cg25048344			ch.15.825727F
								cg22593785			ch.15.83678010R
								cg19373545			ch.15.84283968F
								cg04348247			ch.15.843512R
								cg04261277			ch.15.84621F
								cg02710296			ch.15.859615F
								cg15720832			ch.15.865366R
								cg22790377			ch.15.89498F
								cg06982544			ch.15.90570017R
								cg07702853			ch.15.91235825F
								cg21831898			ch.15.922567R
								cg04362560			ch.15.934240F
								cg09750382			ch.15.94999219F
								cg14126020			ch.15.95956591R
								cg19086599			ch.15.96924465R
								cg24176678			ch.15.97746216F
								cg26844459			ch.15.979660F
								ch.20.532344R			ch.15.99448522F
								cg20399509			ch.16.1077096F
								cg00785112			ch.16.1230298R
								cg11153400			ch.16.1235821R
								cg23595222			ch.16.1296828R
								cg23691090			ch.16.1297358F
								cg26394940			ch.16.1297555R
								cg07795766			ch.16.1306578F
								cg02102114			ch.16.13300564R
								cg02611848			ch.16.1357280F
								cg17019053			ch.16.13852091R
								cg20945085			ch.16.1425090F
								cg17277199			ch.16.1446528F
								cg18587476			ch.16.1486373F
								ch.4.1184577R			ch.16.1512048R
								cg00257271			ch.16.1565572R
								cg22884082			ch.16.1602018R
								cg19735538			ch.16.1667936F
								ch.8.1439749R			ch.16.1684049R
								cg20465143			ch.16.1687320F
								cg21885317			ch.16.1700675R
								cg11750112			ch.16.17742437R
								cg10635895			ch.16.192535R
								ch.3.1209178R			ch.16.2085963R
								cg02293118			ch.16.271253R
								cg18044572			ch.16.296248R
								ch.5.3491617R			ch.16.350833F
								cg03338209			ch.16.364290R
								cg24404878			ch.16.406779R
								cg17124387			ch.16.440507F
								cg02102533			ch.16.46462247F
								cg05004142			ch.16.47020004F
								ch.10.1562909R			ch.16.47102180R
								cg25821783			ch.16.48423040F
								ch.10.1271486F			ch.16.48460639F
								ch.12.2480290F			ch.16.486323F
								ch.12.12432R			ch.16.49831971R
								cg08456247			ch.16.50203861R
								cg27359355			ch.16.50203954R
								cg21523812			ch.16.50217098R
								cg23138608			ch.16.50988881R
								cg06085877			ch.16.51328157R
								cg21821833			ch.16.53179517R
								cg04187185			ch.16.5395104F
								cg10864145			ch.16.54217905R
								cg12059848			ch.16.55305377R
								cg02161084			ch.16.589030R
								cg09053081			ch.16.5927259F
								cg19785066			ch.16.61129843R
								cg01889574			ch.16.62634859F
								ch.17.1008464R			ch.16.64748135R
								ch.17.1009718F			ch.16.64814095R
								cg18424208			ch.16.700349R
								cg23266594			ch.16.71108803R
								cg25132276			ch.16.72302375R
								cg17268992			ch.16.725323R
								ch.1.4190055F			ch.16.74794652R
								cg03284308			ch.16.759907F
								cg00435606			ch.16.78152474R
								ch.5.2235120R			ch.16.785175F
								cg06060835			ch.16.79494380F
								cg01089516			ch.16.82416228R
								cg02544117			ch.16.83989841F
								cg00446758			ch.16.84131625R
								ch.14.43986R			ch.16.85413264R
								ch.16.1163115F			ch.16.85700017R
								cg20371266			ch.16.868576F
								cg00744351			ch.16.8889012F
								cg05529816			ch.16.9041202R
								cg22349396			ch.16.940898F
								ch.12.2473323R			ch.16.9751610F
								ch.12.2105166R			ch.16.97779F
								cg06150195			ch.17.1008464R
								cg12591315			ch.17.1009718F
								cg06117855			ch.17.1102270R
								cg05612506			ch.17.1131311F
								cg11059944			ch.17.1132347R
								cg13830870			ch.17.1132965F
								cg17469479			ch.17.1171617F
								cg20098659			ch.17.1184801R
								cg26262442			ch.17.12041704R
								cg11028769			ch.17.1212751R
								cg18772127			ch.17.1213878F
								ch.1.2348804F			ch.17.1234119R
								cg14228484			ch.17.1247542F
								cg19953799			ch.17.1283089F
								ch.16.1296828R			ch.17.1317324F
								cg25142340			ch.17.1348129R
								cg03750587			ch.17.1364760R
								cg05053327			ch.17.1406968R
								ch.7.3089487R			ch.17.1454035R
								ch.13.601939F			ch.17.1457304R
								cg20383948			ch.17.1508712R
								cg18390610			ch.17.1542746R
								cg06183338			ch.17.1575954R
								cg06449486			ch.17.1629120F
								cg18465484			ch.17.1630550R
								cg12791555			ch.17.1646506R
								ch.2.4215183F			ch.17.16529697F
								cg03292388			ch.17.1659557F
								ch.7.2864275F			ch.17.1711350R
								ch.16.192535R			ch.17.1730525R
								ch.22.138449R			ch.17.1742593R
								cg22399133			ch.17.1746650F
								cg25432738			ch.17.1750110F
								ch.12.292758R			ch.17.1756372F
								cg11303988			ch.17.1874959R
								cg13554744			ch.17.1945262F
								ch.5.2558853F			ch.17.1996417R
								ch.5.2559743R			ch.17.2138644F
								cg13173898			ch.17.230463R
								ch.X.255793R			ch.17.27159102R
								cg17381565			ch.17.27453642F
								cg08873940			ch.17.30079097F
								ch.11.991049F			ch.17.32914407R
								cg10692693			ch.17.35528401F
								cg23874145			ch.17.4249285F
								cg26874693			ch.17.45797972F
								cg13118906			ch.17.46186719R
								cg14204735			ch.17.467709F
								cg09799983			ch.17.480931F
								cg22856324			ch.17.48901521F
								cg22979783			ch.17.48901549F
								cg05127821			ch.17.49865880R
								cg01510388			ch.17.49953103R
								cg00442112			ch.17.51385210R
								cg04887807			ch.17.52148184R
								cg14594187			ch.17.52597345F
								cg27079009			ch.17.53379803R
								ch.1.2438240F			ch.17.5755931R
								cg21238257			ch.17.588105F
								cg26601187			ch.17.59059R
								ch.17.958355F			ch.17.620779R
								ch.22.441164F			ch.17.655115F
								ch.17.1131311F			ch.17.65853408R
								ch.1.3571010R			ch.17.67353124R
								ch.1.3571436F			ch.17.702520F
								cg00959308			ch.17.71764510F
								ch.12.1034102F			ch.17.73175810F
								ch.2.4671106R			ch.17.74596917R
								cg24658899			ch.17.839409R
								cg00114029			ch.17.849637R
								cg26228266			ch.17.922987F
								cg10659805			ch.17.958355F
								cg13449377			ch.18.1002961R
								cg12506468			ch.18.1114073F
								cg10512745			ch.18.152438F
								cg12902206			ch.18.1546242R
								ch.7.557703F			ch.18.18270R
								cg09214398			ch.18.189111R
								cg18362281			ch.18.189560F
								ch.7.3356624R			ch.18.196065F
								cg05035143			ch.18.308031F
								cg03067362			ch.18.310800R
								cg03136712			ch.18.311714R
								cg11822812			ch.18.400468R
								cg22052056			ch.18.4153F
								cg26553763			ch.18.458692R
								cg27187798			ch.18.486455F
								cg20122645			ch.18.544831R
								cg06130360			ch.18.546433R
								cg07996838			ch.18.672159R
								ch.13.1524792R			ch.18.700493F
								cg12918895			ch.18.734816F
								cg15652666			ch.18.773216R
								cg25237365			ch.18.807506F
								cg04173586			ch.18.844464R
								cg27493151			ch.18.925095F
								cg13575271			ch.18.925473R
								cg09821685			ch.18.975209F
								cg06761873			ch.19.1024848R
								cg00487142			ch.19.103226F
								cg07253829			ch.19.1066737F
								cg14836960			ch.19.1125306R
								cg10052908			ch.19.1147496F
								cg00504535			ch.19.11524367R
								cg09795093			ch.19.11892768R
								cg25147604			ch.19.1200890F
								cg23192403			ch.19.12242617R
								cg00465476			ch.19.1271107R
								cg13899314			ch.19.1306964R
								cg16778527			ch.19.1348515F
								cg04325221			ch.19.1349607R
								cg12676534			ch.19.1364541R
								cg04138112			ch.19.1427912R
								cg25417042			ch.19.1633300R
								ch.14.1755952R			ch.19.16613897R
								cg05825244			ch.19.1716179R
								cg19529363			ch.19.1740011R
								cg08690379			ch.19.1746747F
								cg11103390			ch.19.17835377R
								cg04048259			ch.19.1787100F
								cg22869461			ch.19.1892527R
								ch.X.714485F			ch.19.1901489F
								cg00624949			ch.19.1922431F
								cg11108115			ch.19.21460585R
								cg17184326			ch.19.21471048R
								cg21869704			ch.19.22680R
								cg27230140			ch.19.23069863R
								cg05530630			ch.19.23069876R
								ch.7.1264585R			ch.19.233112R
								ch.X.397055F			ch.19.239668R
								ch.10.2544207F			ch.19.24042144R
								ch.10.2545189R			ch.19.24052292F
								ch.10.2545310R			ch.19.33331025R
								ch.2.4679874R			ch.19.33613505F
								cg25706012			ch.19.50335620F
								cg16735682			ch.19.565153F
								cg23129573			ch.19.62825652F
								cg01975505			ch.19.683370F
								cg19170881			ch.19.702771R
								cg18358136			ch.19.714487R
								cg14409083			ch.19.714922F
								cg23473081			ch.19.732135R
								cg03311684			ch.19.7675672F
								cg11195065			ch.19.777701F
								cg03084710			ch.19.820881F
								ch.12.2884988R			ch.19.841535R
								ch.12.2890353F			ch.19.889372R
								cg20297544			ch.19.931598F
								cg08449531			ch.19.931611R
								ch.1.4283968F			ch.19.931767R
								cg05512684			ch.2.101965435R
								cg16557858			ch.2.1028977R
								cg12165841			ch.2.1030760R
								ch.12.1107853R			ch.2.1056241F
								cg13356427			ch.2.105901354F
								ch.12.1173053R			ch.2.109048761R
								cg18651659			ch.2.10906491R
								cg01357429			ch.2.111833563R
								cg01790002			ch.2.112096485F
								cg02194223			ch.2.1123873R
								cg13677149			ch.2.113320801R
								cg15798385			ch.2.1134293R
								cg19480724			ch.2.1149235F
								cg22964918			ch.2.1159565R
								ch.8.2343166R			ch.2.116599701R
								cg03090171			ch.2.117200887F
								cg17985029			ch.2.11889418R
								cg08143875			ch.2.119267486F
								cg21714557			ch.2.121392984R
								ch.X.938089F			ch.2.121457425R
								cg10511332			ch.2.122964391R
								cg27188703			ch.2.123910862R
								cg20337996			ch.2.12395676F
								cg04231677			ch.2.125451341R
								cg06358792			ch.2.126713632R
								cg25851313			ch.2.126989343R
								cg26314055			ch.2.128713295R
								cg09014329			ch.2.129044566R
								cg15909132			ch.2.1382002F
								cg22078805			ch.2.1420302F
								cg23766254			ch.2.1424431R
								cg13917047			ch.2.1436611R
								ch.4.111469F			ch.2.144326562R
								cg06177967			ch.2.144399654R
								ch.8.2465681F			ch.2.1448966F
								cg08211068			ch.2.145029987F
								cg05767299			ch.2.145681601R
								ch.10.182900R			ch.2.147017622F
								cg05363438			ch.2.147019764F
								cg00376544			ch.2.1471425F
								cg02093112			ch.2.147354665R
								cg02374745			ch.2.148139564F
								cg07540103			ch.2.1497140R
								cg21985295			ch.2.151427551F
								cg23729107			ch.2.151701212R
								cg04120272			ch.2.154144R
								cg10600889			ch.2.154349706F
								cg14399930			ch.2.1546374F
								cg22361859			ch.2.1564633R
								cg09856068			ch.2.157204871R
								ch.10.2609808F			ch.2.1580620R
								cg13184177			ch.2.16021837F
								cg10515414			ch.2.16090152F
								cg19495013			ch.2.161489025R
								cg19856499			ch.2.1615265F
								cg10606698			ch.2.1636738F
								cg08464520			ch.2.164613865R
								cg01429859			ch.2.165408785R
								cg25980637			ch.2.165639268R
								cg11648730			ch.2.165987933R
								ch.7.2714749F			ch.2.166260884R
								cg21564289			ch.2.167882003F
								cg16963144			ch.2.168147954R
								cg13065228			ch.2.1685112F
								cg01275887			ch.2.1685296R
								cg07076109			ch.2.1685478R
								cg08368520			ch.2.1701371R
								cg14015401			ch.2.170674427F
								cg03238119			ch.2.172936443R
								ch.14.1402140F			ch.2.1730502R
								cg01916088			ch.2.1786654R
								cg03431741			ch.2.184672693R
								cg18912520			ch.2.184722192F
								cg20847580			ch.2.188569927R
								cg05888872			ch.2.188617146F
								ch.10.410979F			ch.2.1892000F
								cg09841842			ch.2.1894803R
								ch.16.940898F			ch.2.189510808F
								cg01816191			ch.2.1903814R
								ch.3.946759R			ch.2.1904845F
								ch.3.948191R			ch.2.1904847R
								cg14005211			ch.2.1916207F
								cg19620972			ch.2.199803190F
								ch.15.607847R			ch.2.200609314R
								cg05228717			ch.2.200726997F
								cg08802983			ch.2.2007613R
								cg13063344			ch.2.2008119R
								cg13068379			ch.2.2017299F
								cg15128141			ch.2.202877934R
								cg16196939			ch.2.204909450R
								cg19598571			ch.2.206213300F
								cg24387367			ch.2.207814544R
								cg24461952			ch.2.21123043R
								cg24646414			ch.2.2130426F
								ch.1.2975077F			ch.2.2134493R
								cg20410995			ch.2.2149939F
								cg15409097			ch.2.216208170F
								cg22610645			ch.2.217478R
								cg11481133			ch.2.217484879F
								cg06306927			ch.2.219167520R
								cg21830932			ch.2.2207852R
								cg24375465			ch.2.220938702F
								ch.2.121392984R			ch.2.22266060F
								cg11366849			ch.2.224494R
								cg17390350			ch.2.22557879F
								cg05355764			ch.2.225756826F
								cg19599529			ch.2.226985145F
								cg11018271			ch.2.227198071F
								ch.1.3036304F			ch.2.228034896R
								cg03022680			ch.2.2291699F
								ch.1.1416966F			ch.2.229228416R
								ch.19.1125306R			ch.2.23211351R
								cg13821287			ch.2.23282842R
								cg20712263			ch.2.233259725R
								cg11325578			ch.2.235177505R
								cg12875241			ch.2.2367852R
								cg04137003			ch.2.238980020F
								ch.2.2787684R			ch.2.240376F
								cg11214757			ch.2.252555R
								cg05543458			ch.2.25452096R
								cg11805450			ch.2.2562807F
								ch.22.694298R			ch.2.2570960F
								ch.7.1171004F			ch.2.2578847R
								cg10899768			ch.2.2613291R
								cg21273275			ch.2.2616385F
								cg05577902			ch.2.2685596F
								cg15241633			ch.2.2729437F
								cg21258987			ch.2.2759695R
								cg21983531			ch.2.3036752R
								cg20654624			ch.2.3048096R
								cg15465642			ch.2.30727973R
								cg19170660			ch.2.3077115F
								cg03995122			ch.2.30942488F
								cg04520169			ch.2.3109681F
								cg11533881			ch.2.3126978R
								cg12589143			ch.2.3127775F
								cg14449180			ch.2.3132178R
								cg15931205			ch.2.3151712R
								cg14514987			ch.2.3260358R
								ch.10.2006653F			ch.2.3298349F
								ch.17.1730525R			ch.2.3330114R
								cg22567473			ch.2.3372683R
								cg16672562			ch.2.3376566R
								cg01545140			ch.2.3405933F
								cg04962027			ch.2.3422646F
								cg11355603			ch.2.34263334F
								cg24540732			ch.2.3493243F
								ch.22.78028F			ch.2.3495108F
								cg10146929			ch.2.3504351F
								cg14703002			ch.2.3528555R
								cg23829024			ch.2.3542011F
								cg01310019			ch.2.35699F
								cg04796181			ch.2.3682233F
								cg05071577			ch.2.37472519R
								cg05511483			ch.2.3753920R
								cg08782481			ch.2.3787455F
								cg01247537			ch.2.38819824R
								cg05990544			ch.2.3935902R
								cg06323023			ch.2.4034195R
								cg07991112			ch.2.40690643F
								cg25485294			ch.2.4086695R
								cg08746853			ch.2.4098543F
								cg26038582			ch.2.4104651R
								cg05839762			ch.2.4116732R
								cg14772439			ch.2.4215183F
								cg22777062			ch.2.4251330R
								cg24523456			ch.2.42579310F
								ch.20.577701F			ch.2.42601115R
								cg25037394			ch.2.42814419F
								cg10607603			ch.2.4366798R
								ch.12.2515819F			ch.2.4457098R
								ch.1.4885626R			ch.2.4469412F
								ch.19.1348515F			ch.2.4478726F
								ch.19.1349607R			ch.2.4483319R
								cg11921270			ch.2.4489892R
								ch.8.1022548F			ch.2.4543734F
								cg04737131			ch.2.4636382R
								cg22943986			ch.2.4639917R
								cg14044640			ch.2.4671106R
								cg08248516			ch.2.4702687R
								cg16104915			ch.2.47286786F
								cg18447772			ch.2.4739220R
								cg25188395			ch.2.4756204R
								cg02497558			ch.2.48386772R
								cg19986012			ch.2.4917873F
								cg27656658			ch.2.4958278F
								cg01405040			ch.2.4963927F
								cg02694427			ch.2.4964537R
								cg24914355			ch.2.502715F
								cg07708653			ch.2.5127303R
								cg07153588			ch.2.51292200F
								cg02112229			ch.2.52173332R
								ch.16.785175F			ch.2.54406426R
								cg00878163			ch.2.57678997F
								cg08357436			ch.2.58092646R
								cg27366766			ch.2.62306258F
								cg13797425			ch.2.635363R
								cg10598353			ch.2.65899595R
								cg12883479			ch.2.66207210F
								cg17494781			ch.2.6726424R
								cg27469154			ch.2.6773348R
								cg06476131			ch.2.71774667F
								cg11514288			ch.2.7246174F
								cg16188532			ch.2.731300R
								ch.X.881064F			ch.2.7317635R
								ch.X.881546R			ch.2.740763F
								cg08875705			ch.2.74109570F
								cg23737737			ch.2.74439573R
								cg27315157			ch.2.747167F
								cg06353720			ch.2.74841720R
								cg07310984			ch.2.75111475F
								cg14484274			ch.2.75889792R
								cg17629148			ch.2.78120589R
								ch.17.1283089F			ch.2.79376880R
								ch.7.592198R			ch.2.797627R
								ch.11.1435292F			ch.2.800013F
								cg22577136			ch.2.80942047R
								cg27234864			ch.2.81927627R
								cg10292154			ch.2.8227858R
								cg26505691			ch.2.85209317F
								cg08880327			ch.2.8786390R
								cg17427986			ch.2.88242814R
								ch.2.4853641F			ch.2.884792F
								ch.1.1767330R			ch.2.88629272F
								cg24009722			ch.20.1002962F
								cg04012872			ch.20.1003652F
								cg13878677			ch.20.115261R
								cg14433497			ch.20.11977104F
								cg17446010			ch.20.12629947R
								cg20540209			ch.20.1295406F
								ch.14.1499103R			ch.20.1390894R
								cg08680048			ch.20.1436892F
								cg24159247			ch.20.1437006F
								cg10087036			ch.20.1527371F
								cg18537730			ch.20.1534602F
								ch.20.234237F			ch.20.16878662R
								cg02594345			ch.20.19661794R
								cg18188328			ch.20.20712870F
								cg12988813			ch.20.230983F
								cg18372896			ch.20.234237F
								cg09245584			ch.20.24070907R
								cg17683336			ch.20.24371212R
								cg21129729			ch.20.250771F
								cg11913615			ch.20.327316F
								cg20883831			ch.20.378824F
								cg24830730			ch.20.378963R
								cg14498592			ch.20.38346083F
								cg00682002			ch.20.393029F
								cg07039423			ch.20.437154R
								cg22939733			ch.20.46011435R
								cg01757586			ch.20.46106799F
								cg12846837			ch.20.4648144R
								cg12212217			ch.20.46655034F
								cg13746854			ch.20.50084728R
								ch.17.1212751R			ch.20.50133246R
								ch.9.116118R			ch.20.501606F
								cg16848524			ch.20.50358104F
								ch.1.1392349R			ch.20.52179737R
								ch.14.1824732F			ch.20.53118117F
								cg14266237			ch.20.531991F
								cg04877567			ch.20.546216F
								cg18404706			ch.20.54687769F
								cg25888700			ch.20.577701F
								cg22898362			ch.20.61946943R
								ch.17.1247542F			ch.20.6400133F
								cg12121782			ch.20.661824R
								cg09670128			ch.20.682629F
								cg22958090			ch.20.739424F
								ch.14.679957F			ch.20.741059R
								cg17431888			ch.20.750973F
								ch.10.33269R			ch.20.773168F
								cg03644271			ch.20.804375F
								cg06720017			ch.20.829586R
								ch.1.4690234F			ch.20.848555F
								cg14754787			ch.20.904058R
								ch.12.1023240F			ch.20.905431R
								cg03073402			ch.20.940469R
								cg12749132			ch.20.983686F
								cg24051554			ch.21.114870F
								cg00166234			ch.21.17404405R
								cg02046665			ch.21.17972289F
								cg15774864			ch.21.18789295F
								cg22727572			ch.21.20879148R
								cg07093674			ch.21.228978R
								cg15848986			ch.21.25580530F
								cg13020870			ch.21.27853252F
								cg25718467			ch.21.28584518R
								cg26330116			ch.21.29704823F
								cg00904966			ch.21.34239327F
								cg21385746			ch.21.35952245R
								cg12963656			ch.21.366880F
								cg17684207			ch.21.36723363F
								cg24297365			ch.21.377520F
								ch.16.1049690F			ch.21.39853023F
								cg19829856			ch.21.39866785R
								cg09535960			ch.21.40017320F
								cg02524983			ch.21.40139802R
								cg24840300			ch.21.408866F
								cg26253974			ch.21.420934R
								cg18776460			ch.21.43554353R
								cg08327367			ch.21.43742285F
								cg24776498			ch.21.579442R
								cg03366858			ch.21.664518F
								cg18202502			ch.21.720335R
								cg02479773			ch.21.788740F
								cg11875085			ch.21.818333F
								cg10242476			ch.21.820555F
								cg25213795			ch.21.825836R
								cg10619411			ch.22.1008279F
								ch.15.1820989F			ch.22.138449R
								cg11124135			ch.22.147839R
								cg13826564			ch.22.149158R
								cg23272978			ch.22.16108507R
								cg01564640			ch.22.163059F
								cg05114100			ch.22.16454022F
								cg09761040			ch.22.17803970R
								cg06248767			ch.22.217069R
								cg06895953			ch.22.22597277R
								ch.1.1254155F			ch.22.22928834R
								ch.1.1254747R			ch.22.23746271F
								cg18137308			ch.22.243204R
								cg04358131			ch.22.25752197R
								cg15167807			ch.22.26167205F
								cg03208983			ch.22.28920330F
								ch.5.1339988F			ch.22.317144R
								cg25105522			ch.22.33863861F
								cg01730970			ch.22.38010425R
								cg20996351			ch.22.40657F
								cg19457477			ch.22.427671F
								cg14285365			ch.22.43177094F
								ch.9.2049598F			ch.22.436090R
								ch.12.2263569F			ch.22.44116734F
								cg01388796			ch.22.467397R
								cg23173466			ch.22.46830341F
								cg09752199			ch.22.528917R
								ch.17.1348129R			ch.22.533187F
								ch.17.1348593F			ch.22.694298R
								cg03657573			ch.22.707049R
								cg16938490			ch.22.707968R
								ch.21.818333F			ch.22.728807R
								ch.8.1084391F			ch.22.740407F
								cg14926196			ch.22.772318F
								ch.1.944912R			ch.22.78028F
								cg15811668			ch.22.909671F
								cg11260046			ch.3.1012570R
								cg06833110			ch.3.1012680R
								cg16178603			ch.3.1042115R
								cg24368383			ch.3.1045756F
								cg11201447			ch.3.1075622R
								cg01966791			ch.3.1083063F
								cg10420310			ch.3.1112380F
								cg10021238			ch.3.1112796R
								cg04379522			ch.3.1113149F
								cg17365367			ch.3.1119246R
								cg11155172			ch.3.1132748F
								cg04479757			ch.3.1135669F
								cg22504528			ch.3.1209178R
								cg00074313			ch.3.1226245F
								cg11636702			ch.3.1245645R
								cg09899173			ch.3.13151741F
								cg07059402			ch.3.1381988F
								ch.7.2726195R			ch.3.1432250F
								cg12036544			ch.3.1440585F
								cg11648594			ch.3.1444649R
								cg23353432			ch.3.1455028R
								cg05060949			ch.3.151587F
								cg22470056			ch.3.15909166F
								ch.15.1310449F			ch.3.16805090R
								cg14404301			ch.3.16860316F
								cg22117143			ch.3.17169629F
								ch.1.3280899F			ch.3.1736055R
								cg24368031			ch.3.1765161F
								cg03337256			ch.3.183336F
								cg05753693			ch.3.19571190R
								cg06620390			ch.3.2059622R
								cg15092343			ch.3.2133154F
								cg21538208			ch.3.22673962R
								cg00809164			ch.3.23071816R
								cg14709253			ch.3.2338385R
								cg15649045			ch.3.2364134R
								cg05285917			ch.3.2385974R
								cg09330885			ch.3.2399726R
								cg18268177			ch.3.2410502F
								cg25063151			ch.3.2438620R
								ch.20.904058R			ch.3.2456622F
								ch.20.905431R			ch.3.24643237R
								cg11691093			ch.3.2480551F
								cg08781140			ch.3.2560679R
								ch.15.811911R			ch.3.2567129F
								cg25404597			ch.3.2627042R
								cg06216883			ch.3.2634542F
								cg20219329			ch.3.2637085F
								cg21816685			ch.3.2658749R
								cg15370732			ch.3.2729882R
								ch.2.1615265F			ch.3.2780300F
								cg10660253			ch.3.2787532R
								cg20970752			ch.3.2859325R
								cg25540142			ch.3.2883011F
								ch.1.3897073R			ch.3.29258432F
								cg00113096			ch.3.2997854F
								cg04347477			ch.3.3021133F
								cg15085899			ch.3.30723819R
								cg17187521			ch.3.31448979F
								cg22828383			ch.3.3164199R
								cg17519645			ch.3.3261545R
								cg22278033			ch.3.3371471R
								cg06965169			ch.3.33893856R
								ch.13.1182684F			ch.3.343413R
								cg04109822			ch.3.343688R
								cg21382890			ch.3.3439883F
								cg08052226			ch.3.344014F
								cg08317284			ch.3.3451078R
								cg17976191			ch.3.35408643R
								cg09336899			ch.3.3564705F
								cg06297391			ch.3.3584022R
								cg10072995			ch.3.3596501R
								cg01201512			ch.3.360440R
								cg26371957			ch.3.362356R
								cg26654770			ch.3.3630245F
								ch.1.822136R			ch.3.373140F
								cg19923650			ch.3.37390721F
								cg11828470			ch.3.38006391R
								cg27281030			ch.3.382096F
								cg18059223			ch.3.39438485F
								cg14876043			ch.3.397026R
								cg18449187			ch.3.39794766R
								ch.17.1184801R			ch.3.41099661F
								ch.17.1750110F			ch.3.43988081F
								cg17827650			ch.3.44023473F
								cg27191554			ch.3.44870121R
								cg26811159			ch.3.46171638R
								cg25072666			ch.3.52262431R
								cg00836482			ch.3.52786R
								ch.3.343413R			ch.3.54000268R
								ch.3.343688R			ch.3.541014R
								cg26279261			ch.3.55501R
								cg05366139			ch.3.5731500F
								cg14171636			ch.3.59098676R
								cg16485893			ch.3.638689R
								cg00922748			ch.3.680450R
								cg03126946			ch.3.6830780F
								cg14157435			ch.3.69086826R
								ch.1.4146056R			ch.3.693217R
								cg17153382			ch.3.70573422F
								ch.15.1497565F			ch.3.72009955R
								cg00547768			ch.3.72168943F
								cg03350366			ch.3.72608909F
								ch.1.4505949F			ch.3.753362R
								ch.11.152092R			ch.3.78427614R
								ch.15.429642R			ch.3.81030298R
								cg14193825			ch.3.8200463R
								cg23241448			ch.3.82264484R
								cg04850731			ch.3.87020266F
								cg20102336			ch.3.90857F
								cg02038323			ch.3.946759R
								cg26328872			ch.3.948191R
								ch.10.2686225R			ch.3.96438232F
								cg01363662			ch.3.994724R
								cg22051345			ch.4.103499010R
								cg12162138			ch.4.104561249F
								cg26918375			ch.4.1080479F
								cg17924936			ch.4.1098158R
								cg13090596			ch.4.110463737R
								ch.X.1023208F			ch.4.111469F
								cg24046017			ch.4.113910337F
								cg07974511			ch.4.11576235F
								cg10640333			ch.4.116818530F
								cg14409023			ch.4.1169037R
								cg14469209			ch.4.1172045R
								cg19592472			ch.4.11741141R
								cg05477457			ch.4.1184577R
								cg16551732			ch.4.1185987F
								cg16737770			ch.4.12213464R
								ch.1.95724F			ch.4.123725409F
								cg07827337			ch.4.125556998F
								cg13429872			ch.4.125673769F
								cg16635767			ch.4.12604R
								cg21721210			ch.4.129827632R
								cg23293094			ch.4.131239304F
								cg02434121			ch.4.132387F
								cg04961235			ch.4.133369014F
								cg26022183			ch.4.133661909R
								cg02801550			ch.4.134247547R
								cg17392230			ch.4.134822993R
								ch.6.3213513F			ch.4.134900688F
								cg24937136			ch.4.136634687R
								cg00391030			ch.4.137381452F
								cg02474926			ch.4.13872363R
								cg27546118			ch.4.140321500F
								ch.2.4958278F			ch.4.142726813F
								cg08431536			ch.4.146002696F
								cg16529477			ch.4.1463482R
								cg08499046			ch.4.1478851R
								cg16865446			ch.4.1501247F
								cg26094789			ch.4.150648562F
								ch.7.3273938R			ch.4.15214191R
								cg03323953			ch.4.1528651F
								cg13964363			ch.4.153098711F
								cg06398335			ch.4.1530996R
								cg24556334			ch.4.154120390F
								cg17514558			ch.4.154139216R
								cg02452944			ch.4.157207369R
								cg09639151			ch.4.1580997R
								cg11830096			ch.4.161272230R
								cg22151446			ch.4.167276096F
								cg23244790			ch.4.1680698F
								ch.21.825836R			ch.4.1707696F
								ch.1.4597487F			ch.4.171062660F
								ch.1.4603470R			ch.4.176248015F
								cg00127198			ch.4.178543248R
								ch.11.2136200F			ch.4.179413987F
								cg25110734			ch.4.183293081R
								ch.3.2399726R			ch.4.188624547F
								cg25286482			ch.4.1889364R
								cg03148457			ch.4.188979129F
								cg05093591			ch.4.1893073F
								ch.1.385573R			ch.4.194519R
								ch.3.3299193F			ch.4.1971138F
								ch.9.1355968F			ch.4.2045280F
								cg25074185			ch.4.2065340F
								cg19991916			ch.4.2115405R
								cg10591771			ch.4.22775409R
								cg15601195			ch.4.23085918R
								cg03184290			ch.4.2387433R
								cg26831119			ch.4.2455065F
								cg21471580			ch.4.255198F
								cg13428239			ch.4.25763146F
								cg18026225			ch.4.2595101F
								ch.10.1999173F			ch.4.26668475F
								cg00043080			ch.4.2701555R
								cg04018533			ch.4.2714611R
								cg25261547			ch.4.27504789F
								cg24492508			ch.4.27623090R
								cg25407979			ch.4.2824859R
								cg01722861			ch.4.28965407R
								ch.2.2759695R			ch.4.2906511F
								cg08489551			ch.4.2917740F
								cg19987356			ch.4.3045996R
								cg20669292			ch.4.3154602F
								cg05622550			ch.4.3207570F
								cg22712983			ch.4.3239524R
								cg15988569			ch.4.3354065F
								cg23928165			ch.4.33594158R
								ch.12.2922115F			ch.4.3383604F
								ch.2.1903814R			ch.4.3470285F
								ch.4.1185987F			ch.4.3472400R
								ch.19.22680R			ch.4.3479505R
								ch.7.1578169F			ch.4.37457342R
								cg04099091			ch.4.37949012R
								cg13564588			ch.4.39131871R
								cg17364250			ch.4.41983165F
								cg02896941			ch.4.427739F
								cg25425390			ch.4.43528094R
								cg01643123			ch.4.43738163F
								ch.8.214077F			ch.4.43757150F
								cg17336139			ch.4.46116426R
								cg18924324			ch.4.54268536R
								cg07860213			ch.4.55637694R
								cg13267264			ch.4.5614630F
								cg19518104			ch.4.58175585R
								cg02299950			ch.4.58247647F
								cg10893986			ch.4.58270376F
								cg14200569			ch.4.586044R
								cg14217558			ch.4.60646130F
								cg18381051			ch.4.63596126R
								cg20154143			ch.4.6573835F
								cg02081006			ch.4.657973F
								cg14071179			ch.4.658374F
								cg21488279			ch.4.66343068R
								cg06070002			ch.4.698479R
								cg13080137			ch.4.71452R
								ch.8.1077192R			ch.4.73355803R
								ch.17.72133F			ch.4.73928309R
								cg14029489			ch.4.73985647R
								cg16374999			ch.4.74730522R
								cg00706697			ch.4.75060773F
								cg02925367			ch.4.75060805F
								cg05767720			ch.4.77087090F
								cg11945824			ch.4.79753186F
								cg14531663			ch.4.82824696F
								cg14644001			ch.4.8376363R
								cg14757228			ch.4.85799582F
								cg19192280			ch.4.86567531R
								cg21035875			ch.4.868459F
								cg21570988			ch.4.89078329R
								cg22897615			ch.4.938375R
								cg24125828			ch.4.938507R
								cg00401552			ch.4.97150F
								cg19463169			ch.5.1085870R
								cg21912556			ch.5.1134768F
								ch.16.1486373F			ch.5.1150601F
								ch.1.2582316R			ch.5.115380F
								ch.14.1421228R			ch.5.1225211R
								ch.11.2590R			ch.5.12481757R
								ch.9.1921717R			ch.5.12588653R
								ch.9.837340R			ch.5.1264897R
								ch.8.1960908F			ch.5.1324828F
								ch.1.1047298R			ch.5.1325793F
								ch.15.979660F			ch.5.1339988F
								ch.3.2410502F			ch.5.1369403R
								cg06826449			ch.5.1433452R
								ch.9.178852F			ch.5.1443044F
								ch.1.1356605F			ch.5.1450929R
								cg06400119			ch.5.158370R
								cg08022244			ch.5.1607347F
								cg11318054			ch.5.1700054F
								cg14832998			ch.5.1837083R
								cg21712732			ch.5.18883716R
								cg02712036			ch.5.1992431R
								ch.9.1976398F			ch.5.2059852R
								ch.8.2327632F			ch.5.2157599F
								cg02918557			ch.5.2164252F
								cg10516465			ch.5.2251785F
								cg14720773			ch.5.2267148R
								cg19447962			ch.5.2294535F
								cg14999001			ch.5.2313526R
								ch.22.740407F			ch.5.23338039R
								cg22396755			ch.5.23452154R
								cg26604214			ch.5.236818R
								cg05862039			ch.5.23861193F
								cg20059012			ch.5.240336F
								cg25599242			ch.5.24240029R
								cg21461300			ch.5.2444790R
								cg04743654			ch.5.2455726F
								cg03211239			ch.5.2470662F
								cg08894319			ch.5.2517577F
								ch.14.1056569F			ch.5.252072R
								cg13187009			ch.5.2522686R
								cg19506623			ch.5.2533981R
								cg27074040			ch.5.2558853F
								cg03408619			ch.5.2559743R
								cg06356708			ch.5.2564734R
								cg19403104			ch.5.2607995R
								cg19808978			ch.5.2638848F
								cg21941030			ch.5.2644049F
								cg27449041			ch.5.2733100F
								cg24937727			ch.5.2763962F
								ch.1.4798357R			ch.5.2819146F
								cg22589161			ch.5.28714848R
								cg00093058			ch.5.2973702R
								cg19540797			ch.5.30573736R
								cg02486253			ch.5.3099968F
								cg18449956			ch.5.3135990F
								cg22749810			ch.5.31803364R
								ch.7.246556R			ch.5.3183300R
								cg07382347			ch.5.3276032R
								cg12633154			ch.5.3291566R
								cg13185413			ch.5.3304132F
								cg13401893			ch.5.3315058R
								cg15661311			ch.5.3330431R
								cg19764370			ch.5.34664565R
								ch.1.930581F			ch.5.3491617R
								cg25513659			ch.5.35013018R
								cg27500148			ch.5.35311196F
								cg00225603			ch.5.36486227R
								cg07562055			ch.5.37985537F
								cg08673225			ch.5.38673910R
								cg22788485			ch.5.389453F
								cg13005428			ch.5.409282R
								cg18097155			ch.5.42356207R
								cg18201077			ch.5.42387379F
								cg14769786			ch.5.432310R
								cg19383430			ch.5.45171762F
								cg03936721			ch.5.52085246F
								cg14654324			ch.5.52554191R
								ch.1.1079286F			ch.5.52674027R
								cg04312620			ch.5.5396883R
								cg10941835			ch.5.5427157F
								cg12288473			ch.5.56229788F
								ch.2.2685596F			ch.5.58219013F
								ch.11.1421098F			ch.5.6026528F
								cg00102183			ch.5.61135040R
								ch.14.569218R			ch.5.627424R
								cg00446595			ch.5.6287987R
								cg02297063			ch.5.67026991F
								cg02791973			ch.5.67966857R
								cg16238993			ch.5.68016428F
								ch.19.1633300R			ch.5.68282404R
								cg09463917			ch.5.682918R
								cg23188579			ch.5.696714R
								cg07132686			ch.5.71339689R
								cg16956686			ch.5.725956F
								cg10692467			ch.5.731560F
								cg14651518			ch.5.73958282R
								cg07371589			ch.5.7426589F
								cg09143801			ch.5.748880F
								cg16141740			ch.5.754313F
								cg03654727			ch.5.762713R
								ch.3.183336F			ch.5.79606571R
								ch.9.2295001F			ch.5.82154897F
								ch.2.3935127R			ch.5.83804089R
								cg05050042			ch.5.83977780R
								cg05966641			ch.5.884579R
								cg18675043			ch.5.92314382F
								cg23901918			ch.5.942599F
								cg04686264			ch.5.96698337R
								cg10836110			ch.5.978199R
								cg21811204			ch.5.97862610R
								cg19522262			ch.6.104972868R
								ch.5.2564734R			ch.6.105025291R
								ch.15.1221715R			ch.6.105254044F
								cg07982082			ch.6.106373286R
								cg11861406			ch.6.107549394R
								cg13488570			ch.6.107578927F
								cg11313951			ch.6.1080076F
								cg26107890			ch.6.1093576F
								cg26874323			ch.6.113866684R
								cg18842474			ch.6.11493F
								cg17185029			ch.6.115053477R
								cg25326998			ch.6.115952F
								cg07496545			ch.6.1189514F
								cg27320005			ch.6.1206704R
								cg07643355			ch.6.1218502R
								cg20058937			ch.6.122367561R
								cg00955780			ch.6.122375039R
								cg06645921			ch.6.1232832R
								cg09473763			ch.6.1238048R
								ch.19.702771R			ch.6.1239582F
								cg17090968			ch.6.12427391R
								cg26018685			ch.6.1255267F
								cg26212328			ch.6.12702243F
								ch.2.1685478R			ch.6.1297321R
								cg17876831			ch.6.1311487R
								cg05213661			ch.6.133496032R
								cg19728345			ch.6.134515066F
								cg09136245			ch.6.1350768F
								cg20551181			ch.6.137329F
								cg13496041			ch.6.1385876F
								cg11743054			ch.6.139914509F
								cg18789918			ch.6.141680342F
								cg19332075			ch.6.1433484F
								cg24880787			ch.6.143706070F
								cg17092065			ch.6.144195587R
								ch.12.1174756R			ch.6.14534615F
								cg24302688			ch.6.14670643R
								cg03906075			ch.6.147307359R
								cg06496272			ch.6.147534874F
								ch.2.2008119R			ch.6.149019574R
								cg08253651			ch.6.15091466F
								cg15712226			ch.6.153675014R
								ch.2.35699F			ch.6.1541695F
								ch.6.3091160R			ch.6.156307177R
								cg07687131			ch.6.158597687F
								ch.1.3958639R			ch.6.159391054R
								cg13159929			ch.6.163729680F
								cg02083559			ch.6.164862012R
								cg11702456			ch.6.1678538R
								cg10531725			ch.6.168367002R
								cg04579966			ch.6.169008488F
								cg24066731			ch.6.169233872R
								cg26839512			ch.6.1693624F
								cg11140086			ch.6.180632F
								cg01727145			ch.6.20150281F
								cg07921384			ch.6.20366279F
								cg06512885			ch.6.2132867R
								cg08201854			ch.6.2134092F
								cg07066561			ch.6.2146758R
								cg24200960			ch.6.21652857R
								cg04632069			ch.6.2380480F
								cg01225779			ch.6.25083721F
								cg00365499			ch.6.2574971F
								cg13220896			ch.6.2600249F
								cg16529483			ch.6.2623783F
								cg23881566			ch.6.2625594F
								cg04169747			ch.6.2680060R
								ch.20.1437006F			ch.6.2768623F
								cg06422039			ch.6.2771202R
								cg01269537			ch.6.2849527R
								cg14202783			ch.6.2893423F
								ch.1.2648414R			ch.6.2949012F
								cg12598767			ch.6.2958553R
								ch.20.1062061F			ch.6.2988932R
								cg02045894			ch.6.3068315F
								cg08223771			ch.6.30895157R
								cg00410898			ch.6.3091160R
								cg07774884			ch.6.3179791F
								ch.14.1254509R			ch.6.3208581F
								ch.11.1405170R			ch.6.3276431R
								cg09676606			ch.6.3333851R
								ch.14.849914F			ch.6.3354773R
								cg11901544			ch.6.33611621F
								ch.4.71452R			ch.6.34361150R
								ch.17.1630550R			ch.6.37043690R
								cg12220426			ch.6.3866157F
								cg00667789			ch.6.40116829F
								cg24851854			ch.6.40382477R
								ch.1.3259774R			ch.6.41978480R
								cg23108922			ch.6.43016614F
								cg05900140			ch.6.4332024F
								cg22140363			ch.6.44693872F
								cg14497491			ch.6.467964R
								ch.17.2138644F			ch.6.47170703R
								cg06382344			ch.6.499655F
								cg20994660			ch.6.51066775R
								cg26210445			ch.6.53095038R
								cg01697719			ch.6.573831F
								cg04999026			ch.6.57755616R
								cg08382235			ch.6.609614F
								cg01438365			ch.6.614588F
								cg03656099			ch.6.624003F
								cg07095230			ch.6.698823R
								cg18002447			ch.6.738234R
								cg21389753			ch.6.775158F
								cg11357746			ch.6.77755434R
								cg18689332			ch.6.79620741R
								cg25399352			ch.6.81397243F
								cg11853788			ch.6.839713R
								cg15545772			ch.6.8638596F
								cg13858685			ch.6.87517530F
								cg10169194			ch.6.90007516R
								cg26297819			ch.6.93211F
								cg09606832			ch.6.945235F
								cg24286789			ch.6.949970F
								cg08470742			ch.6.952513R
								cg26280713			ch.6.98280058F
								ch.X.1776338R			ch.6.98859407F
								cg15904834			ch.6.99145630F
								ch.12.1183517F			ch.6.99782119R
								cg02647998			ch.7.102590751F
								cg25367691			ch.7.1039544R
								cg21185289			ch.7.106043218F
								cg13531802			ch.7.107350695F
								ch.9.898515R			ch.7.109930408F
								ch.12.2619313F			ch.7.109945386F
								ch.3.2637085F			ch.7.109948253R
								ch.11.1155333R			ch.7.1100907F
								cg18637459			ch.7.111787F
								cg06456031			ch.7.1140112F
								cg18686576			ch.7.114512964F
								cg03317505			ch.7.1147807F
								cg04560810			ch.7.116679792R
								cg14655316			ch.7.1171004F
								cg23255964			ch.7.1172609R
								ch.1.850602F			ch.7.1191358R
								ch.6.1094404R			ch.7.1201720F
								ch.15.658653F			ch.7.120944214F
								cg27137258			ch.7.121194196F
								cg21377521			ch.7.121610422F
								cg22690558			ch.7.122480889F
								cg27665146			ch.7.122671817R
								cg11082691			ch.7.1241660R
								cg23878564			ch.7.1253220F
								cg25830305			ch.7.1264585R
								ch.19.565153F			ch.7.1269058F
								ch.7.1100907F			ch.7.128681R
								cg15642307			ch.7.130270068F
								ch.3.541014R			ch.7.134603089F
								ch.22.163059F			ch.7.135065R
								ch.1.4359995F			ch.7.137529584R
								cg07045089			ch.7.137597056R
								cg24082121			ch.7.137635968R
								cg27261002			ch.7.13771440F
								cg05297854			ch.7.140683712R
								cg11213574			ch.7.140705775R
								cg07226481			ch.7.1415213R
								ch.21.720335R			ch.7.141697R
								cg19091784			ch.7.143447326F
								cg00361495			ch.7.1566587F
								ch.9.1470405F			ch.7.1578169F
								cg14132888			ch.7.1628533R
								cg10852876			ch.7.163474F
								cg14082737			ch.7.1651382F
								cg13023646			ch.7.1699328F
								cg25147158			ch.7.1700983F
								cg00997338			ch.7.1701599F
								cg24348110			ch.7.1710114F
								cg25732410			ch.7.1714607F
								cg27195956			ch.7.1839793F
								ch.7.2066570R			ch.7.1973356R
								cg05869699			ch.7.2011899F
								cg12426196			ch.7.2066570R
								cg13906823			ch.7.2068158F
								cg24161057			ch.7.2086776R
								cg27180868			ch.7.2116294F
								cg06113789			ch.7.2182816F
								ch.2.3376566R			ch.7.2184863F
								ch.1.1540554F			ch.7.2185748R
								cg01857475			ch.7.2186304R
								cg03817911			ch.7.2226368R
								cg20923245			ch.7.2252844R
								cg26614816			ch.7.2254086F
								ch.12.2061504F			ch.7.22672050F
								cg10069155			ch.7.23291137F
								ch.7.1427355R			ch.7.2371643F
								ch.22.147839R			ch.7.24057216F
								ch.7.2902493F			ch.7.2535718F
								ch.15.481908R			ch.7.2635062R
								ch.1.658177R			ch.7.2660938R
								ch.8.2087691R			ch.7.2667284R
								ch.4.938507R			ch.7.2714749F
								cg07135405			ch.7.2726195R
								ch.12.2506678F			ch.7.2773799F
								cg27058832			ch.7.2782052F
								cg00041599			ch.7.2809681F
								cg08539872			ch.7.285380F
								cg24839386			ch.7.2860922R
								cg10317717			ch.7.2864275F
								cg12522898			ch.7.2865377R
								ch.21.366880F			ch.7.288614R
								ch.18.4153F			ch.7.2897584R
								cg06241292			ch.7.2902493F
								cg11098493			ch.7.2968824F
								cg16192751			ch.7.3038064F
								cg22901100			ch.7.3089487R
								ch.X.665616F			ch.7.3102217F
								ch.6.2791833R			ch.7.3114411F
								cg13860281			ch.7.318201F
								ch.3.1112796R			ch.7.3189261R
								ch.3.1113149F			ch.7.32608027F
								cg04184296			ch.7.3273335R
								cg06730678			ch.7.3273938R
								cg10980102			ch.7.3333777R
								cg25027788			ch.7.33727552F
								cg18021902			ch.7.38331565R
								ch.7.2809681F			ch.7.398127F
								cg06664668			ch.7.41200093F
								ch.8.903080R			ch.7.41324965F
								ch.12.26197F			ch.7.42519133R
								cg10272601			ch.7.42690727F
								cg00685723			ch.7.44221780F
								cg02935351			ch.7.453032F
								cg02789515			ch.7.45985950F
								cg15326755			ch.7.48734142F
								ch.8.1782311R			ch.7.49004861R
								cg08498836			ch.7.50621990F
								cg27146152			ch.7.51771937F
								cg09935271			ch.7.52501384F
								cg25760950			ch.7.53629068R
								cg22773661			ch.7.54221757R
								cg25009965			ch.7.54842076F
								cg12603453			ch.7.557703F
								cg14482569			ch.7.558423R
								cg11631265			ch.7.592198R
								ch.19.1528169R			ch.7.647988F
								ch.7.2691555F			ch.7.67314344F
								ch.16.2072386R			ch.7.69934054F
								cg16656286			ch.7.735851R
								ch.4.97150F			ch.7.770055F
								cg19029181			ch.7.794895F
								ch.20.1002962F			ch.7.81940889F
								ch.20.998519F			ch.7.83698262R
								cg02970696			ch.7.83866664R
								cg17003376			ch.7.84013222F
								cg03995300			ch.7.84099448F
								cg27362525			ch.7.84780R
								cg00907473			ch.7.86067222R
								cg13480614			ch.7.87722890F
								cg19102621			ch.7.88141140F
								cg21330896			ch.7.901673F
								cg10768564			ch.7.924839R
								cg03621841			ch.7.95950239F
								cg01871581			ch.7.96796200F
								ch.18.1114073F			ch.8.101580865F
								cg02212772			ch.8.102115565R
								cg19866866			ch.8.1022548F
								cg19926444			ch.8.103893680R
[truncated: 210 more rows]
